# Supplementary material for: The contribution of service density and proximity to geographical inequalities in health care utilisation in Indonesia: A nation-wide multilevel analysis
Source: PubMed Central journal article supplement (PMC7719271; doi:10.7189/jogh.10.020428), 2020-12
Supplement: jogh-10-020428-s001.pdf [file jogh-10-020428-s001.pdf]

**Table S1. Healthcare utilisation, service density, and service proximity at district level**

SPR: Age-sex standardized prevalence rate per 100 persons; GP: General Practitioner to population ratio per 40,000; PHC: Public Health Center to population ratio per 30,000; HOS: Hospital bed to population ratio per 100,000; NUR: Nurse to population ratio per 100,000; TT: Mean travel time to nearest facility in minutes; TC: Mean travel costs to nearest facility in thousand IDR.

| No | Code | Province       | Code | District           | SPR   | 95% CI |      | SPR  | 95% CI |      | GP     | PHC  | HOS    | NUR    | TT    | TC    | TT    | TC    |
|----|------|----------------|------|--------------------|-------|--------|------|------|--------|------|--------|------|--------|--------|-------|-------|-------|-------|
| 1  | 11   | Aceh SR        | 1101 | Simeulue           | 4.41  | 3.08   | 6.1  | 0.91 | 0.38   | 1.81 | 17.70  | 3.53 | 135.40 | 418.00 | 22.41 | 15.73 | 91.83 | 49.98 |
| 2  |      |                | 1102 | Aceh Singkil       | 5.2   | 3.78   | 6.97 | 1.13 | 0.53   | 2.1  | 39.80  | 3.06 | 163.10 | 323.40 | 18.23 | 4.63  | 43.40 | 22.81 |
| 3  |      |                | 1103 | Aceh Selatan       | 6.96  | 5.45   | 8.75 | 2.57 | 1.67   | 3.79 | 22.10  | 3.24 | 132.90 | 176.10 | 23.67 | 3.55  | 52.85 | 4.74  |
| 4  |      |                | 1104 | Aceh Tenggara      | 11.6  | 9.66   | 13.8 | 0.65 | 0.25   | 1.37 | 28.70  | 2.87 | 92.90  | 210.70 | 25.19 | 4.85  | 18.89 | 6.04  |
| 5  |      |                | 1105 | Aceh Timur         | 12.67 | 10.6   | 15   | 4.38 | 3.18   | 5.88 | 24.80  | 2.06 | 78.30  | 140.20 | 27.09 | 7.14  | 41.94 | 14.17 |
| 6  |      |                | 1106 | Aceh Tengah        | 10.04 | 8.21   | 12.2 | 4.64 | 3.44   | 6.12 | 30.30  | 2.27 | 154.80 | 264.10 | 17.57 | 4.63  | 18.34 | 8.04  |
| 7  |      |                | 1107 | Aceh Barat         | 9.33  | 7.67   | 11.2 | 2.75 | 1.89   | 3.87 | 24.10  | 2.13 | 188.30 | 258.90 | 15.72 | 3.93  | 28.72 | 10.48 |
| 8  |      |                | 1108 | Aceh Besar         | 6.37  | 4.99   | 9.8  | 1.58 | 0.96   | 2.45 | 26.50  | 2.27 | 39.70  | 106.20 | 28.99 | 6.41  | 89.72 | 16.87 |
| 9  |      |                | 1109 | Pidie              | 16.18 | 14     | 18.6 | 2.1  | 1.34   | 3.13 | 18.30  | 1.95 | 134.00 | 202.40 | 14.25 | 7.17  | 50.38 | 24.09 |
| 10 |      |                | 1110 | Bireuen            | 13.41 | 11.5   | 15.5 | 3.76 | 2.79   | 4.97 | 27.60  | 1.32 | 194.50 | 179.30 | 19.71 | 6.50  | 27.65 | 12.60 |
| 11 |      |                | 1111 | Aceh Utara         | 12.21 | 10.4   | 14.3 | 2.13 | 1.41   | 3.08 | 17.90  | 1.67 | 19.90  | 90.50  | 26.64 | 7.91  | 69.50 | 40.30 |
| 12 |      |                | 1112 | Aceh Barat Daya    | 6.48  | 4.91   | 8.39 | 2.05 | 1.16   | 3.33 | 30.90  | 2.94 | 123.60 | 302.20 | 8.89  | 4.02  | 23.95 | 8.87  |
| 13 |      |                | 1113 | Gayo Lues          | 3.39  | 2.3    | 4.81 | 1.57 | 0.84   | 2.66 | 38.20  | 4.30 | 121.80 | 231.60 | 14.98 | 3.78  | 65.93 | 14.53 |
| 14 |      |                | 1114 | Aceh Tamiang       | 8.42  | 6.86   | 10.2 | 2.96 | 2.08   | 4.08 | 21.50  | 1.58 | 86.30  | 173.10 | 27.47 | 8.07  | 45.85 | 11.16 |
| 15 |      |                | 1115 | Nagan Raya         | 5.33  | 4      | 6.96 | 1.27 | 0.66   | 2.2  | 32.60  | 2.86 | 95.20  | 209.50 | 13.24 | 5.89  | 34.78 | 14.27 |
| 16 |      |                | 1116 | Aceh Jaya          | 18.28 | 15.6   | 21.2 | 1.31 | 0.67   | 2.29 | 38.30  | 3.71 | 65.60  | 320.40 | 13.79 | 5.91  | 77.54 | 40.87 |
| 17 |      |                | 1117 | Bener Meriah       | 9.61  | 7.78   | 11.7 | 2.58 | 1.68   | 3.79 | 28.00  | 2.56 | 137.50 | 187.20 | 17.98 | 3.61  | 58.13 | 9.68  |
| 18 |      |                | 1118 | Pidie Jaya         | 9.79  | 8.03   | 11.8 | 2.14 | 1.36   | 3.18 | 31.40  | 2.36 | 39.30  | 280.00 | 21.06 | 6.27  | 40.62 | 13.76 |
| 19 |      |                | 1171 | Banda Aceh         | 9.11  | 7.43   | 7.43 | 2.2  | 1.43   | 3.23 | 103.30 | 1.40 | 772.00 | 689.90 | 11.08 | 4.52  | 14.67 | 6.57  |
| 20 |      |                | 1172 | Sabang             | 20.13 | 16.6   | 24.2 | 3.18 | 1.81   | 5.14 | 71.30  | 5.58 | 334.70 | 635.20 | 20.77 | 5.47  | 26.68 | 6.60  |
| 21 |      |                | 1173 | Langsa             | 8.11  | 6.53   | 9.95 | 4.4  | 3.27   | 5.79 | 37.00  | 0.96 | 413.20 | 376.90 | 14.34 | 3.85  | 17.99 | 4.41  |
| 22 |      |                | 1174 | Lhokseumawe        | 11.11 | 9.25   | 13.2 | 5.96 | 4.63   | 7.54 | 38.80  | 1.00 | 367.90 | 339.10 | 15.86 | 5.16  | 21.06 | 8.60  |
| 23 |      |                | 1175 | Subulussalam       | 8.73  | 6.71   | 11.2 | 1.22 | 0.53   | 2.35 | 25.30  | 2.11 | 0.00   | 276.00 | 19.04 | 3.79  | 42.50 | 6.96  |
| 24 | 12   | Sumatera Utara | 1201 | Nias               | 3.69  | 2.58   | 5.1  | 0.37 | 0.10   | 0.95 | 21.20  | 2.19 | 275.70 | 165.80 | 42.03 | 5.29  | 51.08 | 15.32 |
| 25 |      |                | 1202 | Mandailing Natal   | 1.18  | 0.59   | 2.1  | 0.72 | 0.30   | 1.46 | 27.50  | 1.85 | 80.50  | 64.90  | 31.05 | 3.18  | 63.56 | 9.38  |
| 26 |      |                | 1203 | Tapanuli Selatan   | 1.99  | 1.25   | 2.98 | 0.53 | 0.18   | 1.17 | 17.50  | 1.75 | 300.00 | 65.50  | 18.84 | 3.61  | 48.75 | 9.06  |
| 27 |      |                | 1204 | Tapanuli Tengah    | 3.39  | 2.4    | 4.65 | 1.27 | 0.68   | 2.15 | 14.80  | 2.13 | 64.50  | 95.30  | 21.51 | 4.37  | 40.42 | 8.19  |
| 28 |      |                | 1205 | Tapanuli Utara     | 3.43  | 2.52   | 4.54 | 1.10 | 0.59   | 1.85 | 22.30  | 1.96 | 574.60 | 81.40  | 11.81 | 2.70  | 27.11 | 4.44  |
| 29 |      |                | 1206 | Toba Samosir       | 1.84  | 1.08   | 2.92 | 0.53 | 0.19   | 1.18 | 34.40  | 3.16 | 72.50  | 211.70 | 13.75 | 3.27  | 54.69 | 10.82 |
| 30 |      |                | 1207 | Labuhan Batu       | 2.37  | 1.59   | 3.4  | 0.56 | 0.22   | 1.15 | 18.00  | 0.90 | 341.60 | 178.00 | 20.47 | 6.40  | 69.47 | 19.50 |
| 31 |      |                | 1208 | Asahan             | 2.42  | 1.7    | 3.33 | 0.91 | 0.51   | 1.50 | 11.20  | 0.95 | 151.70 | 48.50  | 25.90 | 4.84  | 47.63 | 9.20  |
| 32 |      |                | 1209 | Simalungun         | 3.81  | 2.97   | 4.83 | 1.09 | 0.66   | 1.69 | 14.10  | 1.20 | 166.40 | 65.80  | 17.51 | 3.17  | 28.48 | 5.46  |
| 33 |      |                | 1210 | Dairi              | 3.43  | 2.47   | 4.64 | 1.00 | 0.51   | 1.75 | 19.50  | 1.92 | 103.80 | 128.30 | 25.76 | 3.80  | 55.73 | 9.13  |
| 34 |      |                | 1211 | Karo               | 4.21  | 3.15   | 5.5  | 2.37 | 1.62   | 3.35 | 29.50  | 1.56 | 246.00 | 127.70 | 20.14 | 1.69  | 54.16 | 5.66  |
| 35 |      |                | 1212 | Deli Serdang       | 6.76  | 5.67   | 8.01 | 3.60 | 2.82   | 4.53 | 14.30  | 0.55 | 181.40 | 61.80  | 14.95 | 2.22  | 30.56 | 7.06  |
| 36 |      |                | 1213 | Langkat            | 2.02  | 1.4    | 2.82 | 0.58 | 0.28   | 1.07 | 21.40  | 0.89 | 123.80 | 102.50 | 17.88 | 3.45  | 41.01 | 7.05  |
| 37 |      |                | 1214 | Nias Selatan       | 22.12 | 19.5   | 24.9 | 0.43 | 0.17   | 0.90 | 10.30  | 3.58 | 88.70  | 142.10 | 37.47 | 6.13  | 95.46 | 35.16 |
| 38 |      |                | 1215 | Humbang Hasundutan | 3.94  | 2.83   | 5.34 | 0.48 | 0.16   | 1.12 | 24.60  | 2.01 | 0.00   | 190.60 | 17.49 | 2.32  | 80.61 | 11.53 |
| 39 |      |                | 1216 | Pakpak Bharat      | 3.88  | 2.55   | 5.66 | 1.02 | 0.41   | 2.12 | 54.50  | 5.69 | 605.00 | 355.40 | 18.30 | 2.48  | 25.00 | 2.28  |

|    |    |                |      |                      |       |       |       |      |      |      |       |      |        |        |       |       |        |       |
|----|----|----------------|------|----------------------|-------|-------|-------|------|------|------|-------|------|--------|--------|-------|-------|--------|-------|
| 40 |    |                | 1217 | Samosir              | 3.19  | 2.15  | 4.53  | 2.27 | 1.40 | 3.45 | 30.50 | 2.89 | 0.00   | 182.10 | 23.27 | 2.45  | 41.15  | 5.17  |
| 41 |    |                | 1218 | Serdang Bedagai      | 2.39  | 1.66  | 3.33  | 0.91 | 0.51 | 1.50 | 15.00 | 0.97 | 297.00 | 70.70  | 18.87 | 3.39  | 40.81  | 6.22  |
| 42 |    |                | 1219 | Batu Bara            | 2.44  | 1.64  | 3.5   | 1.00 | 0.53 | 1.71 | 12.00 | 2.19 | 90.80  | 71.00  | 16.54 | 3.54  | 61.76  | 19.23 |
| 43 |    |                | 1220 | Padang Lawas Utara   | 2.73  | 1.81  | 3.95  | 1.00 | 0.51 | 1.77 | 22.30 | 1.00 | 0.00   | 157.10 | 29.49 | 5.56  | 78.22  | 13.04 |
| 44 |    |                | 1221 | Padang Lawas         | 3.97  | 2.75  | 5.52  | 0.72 | 0.27 | 1.50 | 11.10 | 1.79 | 75.60  | 46.00  | 16.00 | 2.61  | 44.81  | 7.81  |
| 45 |    |                | 1222 | Labuhan Batu Selatan | 0.29  | 0.08  | 0.75  | 0.58 | 0.25 | 1.14 | 21.40 | 1.76 | 75.80  | 89.50  | 25.16 | 4.38  | 33.95  | 8.39  |
| 46 |    |                | 1223 | Labuhan Batu Utara   | 2.34  | 1.54  | 3.41  | 0.25 | 0.05 | 0.73 | 14.80 | 1.68 | 15.50  | 128.00 | 32.11 | 8.09  | 54.66  | 14.65 |
| 47 |    |                | 1224 | Nias Utara           | 6.09  | 4.6   | 7.89  | 1.06 | 0.47 | 2.03 | 9.10  | 2.49 | 0.00   | 101.10 | 37.76 | 6.34  | 130.93 | 29.96 |
| 48 |    |                | 1225 | Nias Barat           | 1.68  | 0.99  | 2.67  | 0.36 | 0.10 | 0.92 | 15.20 | 2.82 | 0.00   | 218.20 | 23.28 | 6.26  | 130.82 | 49.69 |
| 49 |    |                | 1271 | Sibolga              | 7.79  | 6.06  | 9.85  | 1.52 | 0.84 | 2.52 | 35.20 | 1.36 | 584.00 | 188.60 | 11.29 | 1.66  | 16.26  | 3.60  |
| 50 |    |                | 1272 | Tanjung Balai        | 10.38 | 8.45  | 12.6  | 0.35 | 0.07 | 1.02 | 27.30 | 1.49 | 146.60 | 163.50 | 9.45  | 3.81  | 18.18  | 7.85  |
| 51 |    |                | 1273 | Pematang Siantar     | 3.82  | 2.83  | 5.04  | 2.14 | 1.41 | 3.10 | 38.00 | 2.33 | 615.10 | 164.80 | 14.04 | 2.39  | 19.41  | 3.26  |
| 52 |    |                | 1274 | Tebing Tinggi        | 7.97  | 6.39  | 9.83  | 3.47 | 2.45 | 4.77 | 39.00 | 1.78 | 562.20 | 198.90 | 11.02 | 4.34  | 14.87  | 5.88  |
| 53 |    |                | 1275 | Medan                | 5.85  | 4.81  | 7.05  | 1.65 | 1.13 | 2.34 | 45.20 | 0.54 | 822.60 | 244.20 | 13.15 | 2.77  | 41.52  | 6.67  |
| 54 |    |                | 1276 | Binjai               | 4.66  | 3.51  | 6.07  | 1.62 | 0.97 | 2.53 | 35.50 | 0.94 | 619.70 | 234.70 | 10.08 | 3.85  | 13.44  | 5.24  |
| 55 |    |                | 1277 | Padangsidempuan      | 2.33  | 1.52  | 3.42  | 0.60 | 0.23 | 1.24 | 20.00 | 1.35 | 385.30 | 136.80 | 11.92 | 2.78  | 25.05  | 5.88  |
| 56 |    |                | 1278 | Gunung Sitoli        | 5.83  | 4.44  | 7.50  | 1.65 | 0.95 | 2.65 | 7.60  | 1.37 | 194.00 | 168.80 | 22.69 | 10.99 | 40.57  | 16.05 |
| 57 | 13 | Sumatera Barat | 1301 | Kepulauan Mentawai   | 7.20  | 5.40  | 9.37  | 0.54 | 0.17 | 1.27 | 26.20 | 3.74 | 99.80  | 332.00 | 50.58 | 12.42 | 181.11 | 64.00 |
| 58 |    |                | 1302 | Pesisir Selatan      | 4.26  | 3.27  | 5.45  | 1.78 | 1.17 | 2.58 | 10.90 | 1.20 | 39.40  | 72.00  | 14.06 | 2.48  | 54.34  | 8.75  |
| 59 |    |                | 1303 | Solok                | 6.38  | 5.07  | 7.93  | 2.26 | 1.50 | 3.26 | 12.30 | 1.47 | 70.60  | 118.40 | 13.86 | 2.36  | 40.61  | 6.36  |
| 60 |    |                | 1304 | Sijunjung            | 6.18  | 4.80  | 7.83  | 2.12 | 1.33 | 3.21 | 25.90 | 1.70 | 63.60  | 152.10 | 17.28 | 3.97  | 43.56  | 11.07 |
| 61 |    |                | 1305 | Tanah Datar          | 7.54  | 6.16  | 9.14  | 1.92 | 1.26 | 2.81 | 19.70 | 1.94 | 52.20  | 100.30 | 12.21 | 4.35  | 26.70  | 11.75 |
| 62 |    |                | 1306 | Padang Pariaman      | 2.94  | 2.11  | 3.99  | 1.40 | 0.85 | 2.18 | 14.60 | 1.82 | 73.70  | 58.30  | 13.23 | 2.75  | 36.39  | 7.63  |
| 63 |    |                | 1307 | Agam                 | 7.24  | 5.87  | 8.83  | 1.24 | 0.73 | 1.96 | 9.20  | 1.38 | 10.20  | 39.90  | 15.37 | 2.59  | 41.52  | 12.84 |
| 64 |    |                | 1308 | Lima Puluh Kota      | 5.18  | 3.97  | 6.65  | 1.73 | 1.06 | 2.65 | 14.20 | 1.80 | 70.90  | 94.90  | 15.77 | 2.87  | 35.58  | 8.79  |
| 65 |    |                | 1309 | Pasaman              | 5.09  | 3.96  | 6.43  | 1.76 | 1.13 | 2.61 | 13.10 | 1.80 | 78.70  | 62.30  | 12.79 | 3.35  | 49.31  | 10.15 |
| 66 |    |                | 1310 | Solok Selatan        | 1.77  | 1.02  | 2.84  | 1.03 | 0.49 | 1.90 | 33.60 | 1.58 | 0.00   | 197.70 | 16.81 | 3.93  | 70.28  | 19.98 |
| 67 |    |                | 1311 | Dharmasraya          | 1.01  | 0.51  | 1.77  | 0.91 | 0.45 | 1.64 | 26.80 | 1.94 | 63.60  | 189.20 | 28.04 | 8.69  | 96.94  | 37.96 |
| 68 |    |                | 1312 | Pasaman Barat        | 2.80  | 1.80  | 4.10  | 1.55 | 0.90 | 2.45 | 13.30 | 1.33 | 23.20  | 97.60  | 16.66 | 3.83  | 55.62  | 15.91 |
| 69 |    |                | 1371 | Padang               | 2.32  | 1.65  | 3.18  | 1.29 | 0.80 | 1.97 | 95.60 | 0.75 | 306.80 | 220.00 | 14.60 | 4.87  | 28.99  | 12.34 |
| 70 |    |                | 1372 | Kota Solok           | 14.08 | 11.66 | 16.84 | 3.97 | 2.75 | 5.55 | 68.80 | 1.92 | 412.90 | 374.50 | 9.98  | 3.13  | 13.16  | 4.33  |
| 71 |    |                | 1373 | Sawah Lunto          | 16.34 | 13.81 | 19.19 | 3.67 | 2.54 | 5.13 | 58.50 | 3.01 | 247.40 | 339.30 | 11.77 | 2.66  | 23.51  | 6.21  |
| 72 |    |                | 1374 | Padang Panjang       | 12.76 | 10.26 | 15.69 | 3.48 | 2.24 | 5.14 | 54.60 | 2.43 | 416.60 | 390.30 | 8.89  | 1.27  | 10.79  | 1.84  |
| 73 |    |                | 1375 | Bukittinggi          | 7.93  | 6.30  | 9.84  | 3.22 | 2.23 | 4.49 | 65.80 | 1.79 | 663.60 | 608.90 | 10.20 | 1.97  | 14.37  | 3.21  |
| 74 |    |                | 1376 | Payakumbuh           | 6.07  | 4.61  | 7.85  | 1.82 | 1.06 | 2.93 | 45.60 | 1.95 | 216.40 | 231.10 | 10.54 | 1.93  | 17.85  | 3.25  |
| 75 |    |                | 1377 | Pariaman             | 5.52  | 4.22  | 7.09  | 2.80 | 1.87 | 4.01 | 73.40 | 2.53 | 87.80  | 301.90 | 14.47 | 3.76  | 18.03  | 4.95  |
| 76 | 14 | Riau           | 1401 | Kuantan Singingi     | 7.12  | 5.64  | 8.87  | 2.23 | 1.43 | 3.33 | 15.20 | 2.06 | 38.50  | 108.80 | 31.65 | 13.32 | 74.71  | 60.95 |
| 77 |    |                | 1402 | Indragiri Hulu       | 4.16  | 2.99  | 5.61  | 1.24 | 0.63 | 2.17 | 13.70 | 1.29 | 29.70  | 87.20  | 17.73 | 3.71  | 29.85  | 8.61  |
| 78 |    |                | 1403 | Indragiri Hilir      | 3.41  | 2.51  | 4.53  | 0.64 | 0.29 | 1.21 | 10.50 | 0.99 | 31.70  | 73.60  | 30.95 | 7.78  | 24.61  | 10.33 |
| 79 |    |                | 1404 | Pelalawan            | 3.69  | 2.60  | 5.05  | 0.72 | 0.33 | 1.32 | 22.50 | 1.04 | 85.10  | 104.50 | 21.81 | 11.99 | 46.83  | 29.91 |
| 80 |    |                | 1405 | Siak                 | 2.21  | 1.43  | 3.26  | 0.79 | 0.39 | 1.42 | 17.80 | 1.04 | 26.60  | 111.90 | 14.03 | 6.93  | 69.93  | 33.23 |
| 81 |    |                | 1406 | Kampar               | 4.00  | 2.89  | 5.37  | 0.91 | 0.47 | 1.57 | 12.00 | 1.18 | 54.40  | 64.40  | 19.21 | 8.59  | 81.43  | 36.85 |
| 82 |    |                | 1407 | Rokan Hulu           | 2.76  | 1.85  | 3.94  | 0.84 | 0.37 | 1.60 | 12.10 | 1.16 | 54.50  | 67.30  | 16.61 | 4.51  | 36.17  | 17.89 |
| 83 |    |                | 1408 | Bengkalis            | 7.40  | 5.96  | 9.07  | 1.01 | 0.53 | 1.74 | 19.10 | 0.58 | 91.90  | 94.20  | 21.33 | 10.02 | 40.05  | 23.14 |
| 84 |    |                | 1409 | Rokan Hilir          | 5.75  | 4.54  | 7.17  | 2.24 | 1.51 | 3.18 | 12.60 | 0.80 | 25.50  | 93.00  | 18.54 | 6.19  | 53.74  | 24.52 |
| 85 |    |                | 1410 | Kepulauan Meranti    | 6.28  | 4.83  | 8.02  | 0.39 | 0.10 | 0.99 | 15.80 | 1.33 | 39.00  | 75.10  | 27.54 | 9.82  | 72.17  | 99.41 |
| 86 |    |                | 1471 | Pekanbaru            | 3.25  | 2.32  | 4.41  | 1.18 | 0.61 | 2.02 | 36.40 | 0.58 | 310.70 | 218.10 | 22.47 | 8.22  | 37.75  | 15.16 |
| 87 |    |                | 1473 | Dumai                | 3.06  | 1.98  | 4.48  | 0.91 | 0.39 | 1.76 | 29.20 | 0.93 | 127.00 | 153.10 | 16.44 | 5.38  | 27.06  | 9.95  |

|     |    |                  |      |                       |       |       |       |      |      |      |       |      |        |        |       |      |        |       |
|-----|----|------------------|------|-----------------------|-------|-------|-------|------|------|------|-------|------|--------|--------|-------|------|--------|-------|
| 88  | 15 | Jambi            | 1501 | Kerinci               | 7.89  | 6.35  | 9.69  | 2.20 | 1.43 | 3.22 | 19.00 | 2.13 | 54.90  | 123.60 | 11.01 | 2.35 | 52.36  | 6.62  |
| 89  |    |                  | 1502 | Merangin              | 2.91  | 2.02  | 4.05  | 0.91 | 0.44 | 1.64 | 13.60 | 1.55 | 36.40  | 126.50 | 16.27 | 6.02 | 33.06  | 14.87 |
| 90  |    |                  | 1503 | Sarolangun            | 1.19  | 0.64  | 2.02  | 0.68 | 0.30 | 1.31 | 14.70 | 1.44 | 37.50  | 143.10 | 28.23 | 7.24 | 73.13  | 17.78 |
| 91  |    |                  | 1504 | Batang Hari           | 6.92  | 5.36  | 8.76  | 2.69 | 1.82 | 3.82 | 20.70 | 1.91 | 76.20  | 212.50 | 18.21 | 4.98 | 64.61  | 20.48 |
| 92  |    |                  | 1505 | Muaro Jambi           | 1.40  | 0.81  | 2.24  | 0.36 | 0.09 | 0.90 | 21.70 | 1.43 | 66.60  | 99.10  | 23.12 | 3.50 | 50.61  | 10.49 |
| 93  |    |                  | 1506 | Tanjung Jabung Timur  | 2.88  | 2.00  | 4.00  | 0.50 | 0.18 | 1.10 | 11.00 | 2.25 | 24.30  | 105.90 | 20.63 | 4.73 | 88.58  | 30.11 |
| 94  |    |                  | 1507 | Tanjung Jabung Barat  | 4.13  | 3.10  | 5.40  | 0.94 | 0.49 | 1.65 | 18.90 | 1.56 | 28.00  | 130.40 | 17.22 | 2.98 | 84.04  | 15.48 |
| 95  |    |                  | 1508 | Tebo                  | 3.13  | 2.21  | 4.29  | 0.62 | 0.27 | 1.23 | 13.10 | 1.28 | 27.70  | 84.90  | 23.83 | 6.52 | 90.70  | 25.80 |
| 96  |    |                  | 1509 | Bungo                 | 4.50  | 3.43  | 5.80  | 1.62 | 1.00 | 2.49 | 12.00 | 1.61 | 108.80 | 171.90 | 13.34 | 5.28 | 37.54  | 13.62 |
| 97  |    |                  | 1571 | Jambi                 | 3.99  | 2.96  | 5.24  | 0.97 | 0.49 | 1.70 | 46.50 | 1.02 | 308.60 | 277.20 | 10.77 | 3.12 | 23.97  | 8.33  |
| 98  |    |                  | 1572 | Sungai Penuh          | 12.31 | 10.24 | 14.68 | 3.85 | 2.74 | 5.25 | 13.20 | 1.98 | 0.00   | 91.40  | 11.56 | 3.45 | 16.56  | 4.86  |
| 99  | 16 | Sumatera Selatan | 1601 | Ogan Komering Ulu     | 2.05  | 1.43  | 2.83  | 0.72 | 0.37 | 1.23 | 9.20  | 1.38 | 110.40 | 78.20  | 40.10 | 9.75 | 66.06  | 13.22 |
| 100 |    |                  | 1602 | Ogan Komering Ilir    | 1.37  | 0.88  | 2.04  | 0.61 | 0.30 | 1.10 | 9.50  | 1.11 | 28.60  | 95.20  | 22.04 | 9.51 | 115.38 | 64.84 |
| 101 |    |                  | 1603 | Muara Enim            | 2.22  | 1.53  | 3.09  | 1.37 | 0.84 | 2.12 | 10.30 | 0.98 | 45.00  | 70.30  | 15.41 | 4.49 | 59.65  | 19.98 |
| 102 |    |                  | 1604 | Lahat                 | 1.62  | 1.01  | 2.46  | 0.45 | 0.16 | 0.97 | 13.90 | 2.34 | 66.00  | 103.50 | 18.93 | 3.55 | 54.06  | 8.08  |
| 103 |    |                  | 1605 | Musi Rawas            | 3.73  | 2.79  | 4.88  | 1.48 | 0.88 | 2.31 | 9.60  | 1.44 | 22.70  | 116.00 | 20.51 | 4.74 | 91.75  | 16.26 |
| 104 |    |                  | 1606 | Musi Banyuasin        | 0.99  | 0.58  | 1.58  | 0.36 | 0.14 | 0.75 | 15.10 | 1.29 | 48.80  | 88.90  | 27.48 | 8.39 | 79.41  | 52.06 |
| 105 |    |                  | 1607 | Banyuasin             | 1.78  | 1.19  | 2.56  | 1.07 | 0.63 | 1.70 | 10.90 | 1.08 | 9.80   | 48.40  | 19.94 | 6.34 | 76.02  | 23.91 |
| 106 |    |                  | 1608 | Ogan Komering Ulu Slt | 2.49  | 1.63  | 3.61  | 0.90 | 0.45 | 1.59 | 7.30  | 1.67 | 19.90  | 81.60  | 23.41 | 6.80 | 108.04 | 37.61 |
| 107 |    |                  | 1609 | Ogan Komering Ulu Tmr | 1.95  | 1.33  | 2.74  | 0.14 | 0.02 | 0.51 | 6.10  | 1.01 | 33.60  | 83.70  | 51.03 | 9.03 | 59.92  | 24.82 |
| 108 |    |                  | 1610 | Ogan Ilir             | 1.19  | 0.67  | 1.95  | 0.56 | 0.24 | 1.11 | 7.60  | 1.83 | 0.00   | 67.00  | 78.95 | 5.37 | 118.01 | 55.62 |
| 109 |    |                  | 1611 | Empat Lawang          | 1.94  | 1.28  | 2.81  | 0.36 | 0.11 | 0.85 | 8.40  | 1.01 | 25.70  | 45.10  | 14.77 | 3.32 | 47.64  | 9.91  |
| 110 |    |                  | 1671 | Palembang             | 11.24 | 9.88  | 12.72 | 3.12 | 2.43 | 3.94 | 25.00 | 0.75 | 287.90 | 190.80 | 15.36 | 2.55 | 29.24  | 5.50  |
| 111 |    |                  | 1672 | Prabumulih            | 7.01  | 5.56  | 8.73  | 4.13 | 3.04 | 5.47 | 34.50 | 1.38 | 276.10 | 293.30 | 12.91 | 3.38 | 23.54  | 8.85  |
| 112 |    |                  | 1673 | Pagar Alam            | 6.85  | 5.40  | 8.57  | 1.72 | 1.03 | 2.69 | 21.40 | 1.55 | 118.10 | 185.30 | 12.75 | 2.65 | 25.61  | 5.22  |
| 113 |    |                  | 1674 | Lubuk Linggau         | 7.61  | 6.10  | 9.37  | 2.33 | 1.52 | 3.40 | 13.40 | 1.25 | 173.60 | 144.40 | 14.93 | 3.09 | 19.53  | 4.97  |
| 114 | 17 | Bengkulu         | 1701 | Bengkulu Selatan      | 4.11  | 2.94  | 5.60  | 2.23 | 1.40 | 3.36 | 26.90 | 2.76 | 70.20  | 219.90 | 12.07 | 4.51 | 11.61  | 3.91  |
| 115 |    |                  | 1702 | Rejang Lebong         | 2.75  | 1.88  | 3.87  | 0.38 | 0.12 | 0.91 | 15.60 | 2.40 | 55.50  | 127.00 | 13.85 | 7.08 | 18.10  | 5.63  |
| 116 |    |                  | 1703 | Bengkulu Utara        | 2.17  | 1.41  | 3.19  | 0.71 | 0.30 | 1.41 | 18.90 | 2.40 | 69.50  | 150.40 | 17.78 | 6.46 | 54.52  | 28.67 |
| 117 |    |                  | 1704 | Kaur                  | 1.88  | 1.14  | 2.92  | 0.53 | 0.19 | 1.17 | 27.80 | 4.17 | 84.30  | 147.80 | 9.89  | 6.46 | 47.08  | 17.52 |
| 118 |    |                  | 1705 | Seluma                | 1.98  | 1.23  | 3.01  | 0.34 | 0.09 | 0.88 | 11.40 | 3.57 | 33.50  | 89.20  | 16.48 | 6.47 | 41.10  | 41.61 |
| 119 |    |                  | 1706 | Mukomuko              | 5.80  | 4.44  | 7.42  | 1.05 | 0.55 | 1.80 | 29.50 | 3.07 | 66.90  | 222.90 | 12.19 | 5.49 | 51.76  | 22.33 |
| 120 |    |                  | 1707 | Lebong                | 2.91  | 1.96  | 4.15  | 1.00 | 0.47 | 1.86 | 18.90 | 3.97 | 27.40  | 128.60 | 9.52  | 6.50 | 41.56  | 33.31 |
| 121 |    |                  | 1708 | Kepahiang             | 3.46  | 2.38  | 4.86  | 0.74 | 0.29 | 1.52 | 13.50 | 3.16 | 85.70  | 129.30 | 14.00 | 6.85 | 27.68  | 16.09 |
| 122 |    |                  | 1709 | Bengkulu Tengah       | 3.05  | 2.04  | 4.37  | 0.57 | 0.18 | 1.34 | 29.60 | 5.73 | 17.20  | 125.00 | 11.61 | 4.03 | 42.59  | 17.12 |
| 123 |    |                  | 1771 | Bengkulu              | 2.60  | 1.74  | 3.71  | 1.82 | 1.13 | 2.76 | 40.40 | 1.82 | 315.10 | 313.80 | 12.06 | 3.92 | 24.86  | 7.27  |
| 124 | 18 | Lampung          | 1801 | Lampung Barat         | 2.15  | 1.47  | 3.02  | 0.50 | 0.20 | 1.00 | 12.10 | 1.43 | 170.60 | 66.50  | 20.04 | 5.09 | 96.42  | 56.61 |
| 125 |    |                  | 1802 | Tanggamus             | 3.34  | 2.45  | 4.45  | 0.70 | 0.31 | 1.31 | 6.80  | 1.23 | 61.20  | 41.40  | 36.11 | 6.57 | 75.24  | 30.91 |
| 126 |    |                  | 1803 | Lampung Selatan       | 3.93  | 3.04  | 5.00  | 1.04 | 0.61 | 1.64 | 7.40  | 0.82 | 50.20  | 49.30  | 27.85 | 7.21 | 61.08  | 16.33 |
| 127 |    |                  | 1804 | Lampung Timur         | 6.44  | 5.31  | 7.74  | 0.84 | 0.47 | 1.39 | 7.00  | 0.99 | 16.00  | 36.30  | 14.59 | 4.67 | 59.86  | 54.02 |
| 128 |    |                  | 1805 | Lampung Tengah        | 3.47  | 2.66  | 4.46  | 0.76 | 0.41 | 1.30 | 10.60 | 0.90 | 44.00  | 67.60  | 21.32 | 4.55 | 88.02  | 30.27 |
| 129 |    |                  | 1806 | Lampung Utara         | 7.54  | 6.16  | 9.12  | 1.14 | 0.64 | 1.86 | 11.10 | 1.27 | 65.60  | 189.10 | 22.20 | 3.84 | 31.90  | 9.34  |
| 130 |    |                  | 1807 | Way Kanan             | 2.94  | 2.12  | 3.97  | 0.76 | 0.39 | 1.33 | 14.80 | 1.34 | 53.60  | 92.60  | 18.83 | 4.21 | 58.87  | 13.16 |
| 131 |    |                  | 1808 | Tulang Bawang         | 1.94  | 1.24  | 2.89  | 0.61 | 0.27 | 1.17 | 11.50 | 1.30 | 33.80  | 82.30  | 21.92 | 4.39 | 52.89  | 29.43 |
| 132 |    |                  | 1809 | Pesawaran             | 4.93  | 3.87  | 6.19  | 0.77 | 0.38 | 1.38 | 7.40  | 0.86 | 0.00   | 26.60  | 20.10 | 3.92 | 76.16  | 18.59 |
| 133 |    |                  | 1810 | Pringsewu             | 0.60  | 0.27  | 1.14  | 0.14 | 0.02 | 0.50 | 12.80 | 0.86 | 22.20  | 110.20 | 19.07 | 4.18 | 56.88  | 7.62  |
| 134 |    |                  | 1811 | Mesuji                | 1.29  | 0.71  | 2.17  | 0.48 | 0.15 | 1.12 | 10.70 | 1.83 | 0.00   | 86.60  | 18.24 | 5.36 | 103.04 | 58.81 |
| 135 |    |                  | 1812 | Tulang Bawang Barat   | 1.89  | 1.17  | 2.88  | 0.70 | 0.32 | 1.34 | 5.30  | 1.03 | 0.00   | 46.10  | 17.22 | 4.16 | 51.88  | 13.97 |

|     |    |                 |      |                   |       |       |       |      |      |      |        |       |        |        |       |       |        |        |
|-----|----|-----------------|------|-------------------|-------|-------|-------|------|------|------|--------|-------|--------|--------|-------|-------|--------|--------|
| 136 |    |                 | 1871 | Bandar Lampung    | 4.10  | 3.20  | 5.17  | 1.76 | 1.20 | 2.49 | 29.20  | 0.97  | 222.60 | 156.00 | 21.57 | 5.67  | 31.73  | 7.43   |
| 137 |    |                 | 1872 | Metro             | 3.97  | 2.94  | 5.25  | 2.08 | 1.35 | 3.05 | 57.70  | 2.16  | 364.10 | 300.50 | 12.77 | 4.51  | 19.87  | 6.75   |
| 138 | 19 | Bangka Belitung | 1901 | Bangka            | 8.90  | 7.25  | 10.83 | 2.48 | 1.65 | 3.59 | 28.10  | 1.15  | 143.50 | 168.40 | 14.53 | 5.58  | 37.95  | 36.00  |
| 139 |    |                 | 1902 | Belitung          | 6.50  | 5.12  | 8.13  | 2.55 | 1.70 | 3.68 | 23.30  | 1.53  | 164.20 | 160.80 | 16.38 | 5.95  | 30.63  | 12.52  |
| 140 |    |                 | 1903 | Bangka Barat      | 6.66  | 5.12  | 8.50  | 0.89 | 0.40 | 1.70 | 15.20  | 1.21  | 69.30  | 162.90 | 17.57 | 6.10  | 34.89  | 10.83  |
| 141 |    |                 | 1904 | Bangka Tengah     | 7.77  | 6.11  | 9.74  | 1.73 | 1.02 | 2.72 | 19.20  | 1.32  | 33.50  | 135.20 | 12.88 | 6.41  | 34.70  | 16.87  |
| 142 |    |                 | 1905 | Bangka Selatan    | 10.28 | 8.36  | 12.51 | 2.62 | 1.70 | 3.86 | 14.90  | 1.39  | 36.50  | 131.50 | 10.47 | 4.66  | 52.34  | 83.08  |
| 143 |    |                 | 1906 | Belitung Timur    | 3.94  | 2.76  | 5.44  | 2.15 | 1.30 | 3.34 | 25.00  | 1.50  | 61.60  | 268.80 | 18.19 | 8.06  | 44.88  | 20.75  |
| 144 |    |                 | 1971 | Pangkal Pinang    | 12.25 | 10.26 | 14.51 | 3.21 | 2.22 | 4.50 | 42.10  | 1.37  | 196.20 | 303.20 | 7.91  | 2.38  | 14.63  | 5.07   |
| 145 | 21 | Kepulauan Riau  | 2101 | Karimun           | 10.63 | 8.83  | 12.69 | 1.26 | 0.70 | 2.09 | 32.70  | 1.05  | 92.10  | 200.20 | 12.59 | 6.63  | 71.15  | 68.11  |
| 146 |    |                 | 2102 | Bintan            | 6.31  | 4.84  | 8.07  | 2.62 | 1.73 | 3.81 | 52.40  | 2.44  | 67.90  | 273.00 | 18.57 | 7.69  | 50.68  | 29.46  |
| 147 |    |                 | 2103 | Natuna            | 3.55  | 2.37  | 5.12  | 2.80 | 1.70 | 4.31 | 73.10  | 4.67  | 183.20 | 541.30 | 21.24 | 5.93  | 57.36  | 24.33  |
| 148 |    |                 | 2104 | Lingga            | 7.18  | 5.56  | 9.13  | 1.13 | 0.56 | 2.03 | 35.50  | 2.01  | 96.80  | 406.30 | 16.76 | 6.43  | 25.49  | 13.11  |
| 149 |    |                 | 2105 | Kepulauan Anambas | 14.58 | 11.89 | 17.68 | 2.68 | 1.59 | 4.19 | 64.10  | 4.64  | 30.90  | 538.20 | 21.67 | 19.19 | 48.38  | 50.29  |
| 150 |    |                 | 2171 | Batam             | 6.93  | 5.31  | 8.84  | 3.64 | 2.46 | 5.13 | 13.70  | 0.65  | 124.90 | 89.00  | 18.12 | 7.90  | 38.56  | 20.36  |
| 151 |    |                 | 2172 | Tanjung Pinang    | 8.41  | 6.72  | 10.37 | 1.93 | 1.19 | 2.97 | 31.30  | 0.79  | 215.70 | 348.50 | 10.78 | 4.70  | 17.34  | 6.46   |
| 152 | 31 | DKI Jakarta     | 3101 | Kepulauan Seribu  | 23.00 | 18.65 | 28.00 | 0.35 | 0.04 | 1.27 | 107.90 | 10.79 | 67.40  | 602.50 | 18.14 | 1.53  | 120.27 | 125.76 |
| 153 |    |                 | 3171 | Jakarta Selatan   | 11.86 | 10.12 | 13.81 | 3.27 | 2.38 | 4.39 | 24.20  | 1.08  | 204.10 | 160.80 | 13.19 | 2.66  | 28.66  | 7.27   |
| 154 |    |                 | 3172 | Jakarta Timur     | 13.09 | 11.49 | 14.84 | 3.70 | 2.89 | 4.67 | 23.50  | 0.93  | 197.60 | 158.00 | 11.08 | 1.90  | 23.27  | 5.48   |
| 155 |    |                 | 3173 | Jakarta Pusat     | 6.24  | 5.04  | 7.64  | 1.75 | 1.14 | 2.56 | 60.70  | 1.32  | 651.20 | 587.50 | 11.39 | 3.24  | 23.45  | 9.50   |
| 156 |    |                 | 3174 | Jakarta Barat     | 7.00  | 5.91  | 8.23  | 1.78 | 1.27 | 2.41 | 15.70  | 0.93  | 150.10 | 121.60 | 13.20 | 4.90  | 28.78  | 12.47  |
| 157 |    |                 | 3175 | Jakarta Utara     | 6.81  | 5.62  | 8.17  | 1.59 | 1.04 | 2.31 | 26.00  | 0.85  | 162.80 | 154.80 | 14.01 | 2.24  | 36.62  | 7.99   |
| 158 | 32 | Jawa Barat      | 3201 | Bogor             | 7.04  | 10.96 | 13.86 | 2.57 | 1.97 | 3.29 | 8.70   | 0.59  | 69.40  | 36.00  | 16.61 | 3.79  | 43.03  | 11.32  |
| 159 |    |                 | 3202 | Sukabumi          | 6.86  | 5.98  | 8.22  | 1.78 | 1.27 | 2.42 | 6.20   | 0.69  | 266.20 | 29.00  | 20.32 | 5.96  | 41.36  | 9.28   |
| 160 |    |                 | 3203 | Cianjur           | 13.28 | 5.79  | 8.08  | 1.11 | 0.71 | 1.65 | 4.80   | 0.58  | 20.40  | 34.60  | 34.33 | 5.11  | 136.57 | 18.14  |
| 161 |    |                 | 3204 | Bandung           | 5.03  | 11.83 | 14.86 | 3.27 | 2.58 | 4.10 | 4.50   | 0.54  | 31.00  | 31.50  | 17.79 | 2.70  | 48.12  | 12.08  |
| 162 |    |                 | 3205 | Garut             | 8.35  | 4.18  | 6.01  | 0.24 | 0.09 | 0.53 | 3.90   | 0.75  | 32.60  | 48.20  | 27.00 | 5.23  | 73.82  | 19.90  |
| 163 |    |                 | 3206 | Tasikmalaya       | 6.94  | 7.06  | 9.79  | 1.02 | 0.60 | 1.60 | 4.30   | 0.67  | 40.50  | 26.70  | 20.99 | 4.33  | 89.02  | 15.28  |
| 164 |    |                 | 3207 | Ciamis            | 10.14 | 5.85  | 8.16  | 1.27 | 0.85 | 1.82 | 6.10   | 0.95  | 41.00  | 43.60  | 21.03 | 4.05  | 58.00  | 21.31  |
| 165 |    |                 | 3208 | Kuningan          | 6.99  | 8.76  | 11.67 | 2.09 | 1.48 | 2.85 | 10.20  | 1.00  | 82.90  | 56.00  | 18.00 | 3.17  | 58.05  | 10.59  |
| 166 |    |                 | 3209 | Cirebon           | 11.95 | 5.96  | 8.13  | 1.39 | 0.95 | 1.95 | 10.00  | 0.77  | 69.90  | 78.00  | 17.72 | 3.01  | 46.72  | 8.69   |
| 167 |    |                 | 3210 | Majalengka        | 7.78  | 10.34 | 13.74 | 1.71 | 1.14 | 2.45 | 6.90   | 0.77  | 41.90  | 59.70  | 17.01 | 2.88  | 52.52  | 10.26  |
| 168 |    |                 | 3211 | Sumedang          | 7.63  | 6.56  | 9.15  | 2.20 | 1.57 | 2.99 | 5.30   | 0.82  | 32.00  | 61.30  | 24.98 | 3.79  | 58.80  | 13.37  |
| 169 |    |                 | 3212 | Indramayu         | 8.83  | 6.44  | 8.97  | 1.57 | 1.03 | 2.26 | 6.30   | 0.82  | 27.60  | 53.70  | 15.62 | 3.28  | 37.93  | 9.25   |
| 170 |    |                 | 3213 | Subang            | 10.05 | 7.60  | 10.22 | 2.11 | 1.52 | 2.85 | 6.50   | 0.76  | 43.90  | 64.50  | 19.14 | 4.70  | 54.35  | 23.07  |
| 171 |    |                 | 3214 | Purwakarta        | 3.91  | 8.55  | 11.74 | 3.24 | 2.42 | 4.25 | 11.30  | 0.65  | 100.00 | 104.70 | 20.54 | 3.07  | 42.68  | 6.96   |
| 172 |    |                 | 3215 | Karawang          | 5.24  | 3.12  | 4.83  | 0.99 | 0.62 | 1.48 | 9.40   | 0.66  | 84.90  | 90.30  | 15.60 | 4.82  | 38.36  | 9.53   |
| 173 |    |                 | 3216 | Bekasi            | 9.65  | 4.31  | 6.31  | 2.00 | 1.44 | 2.71 | 10.00  | 0.41  | 99.40  | 58.40  | 17.65 | 3.38  | 41.65  | 11.84  |
| 174 |    |                 | 3217 | Bandung Barat     | 9.65  | 8.30  | 11.15 | 1.65 | 1.13 | 2.33 | 5.80   | 0.57  | 31.80  | 29.80  | 21.15 | 4.10  | 42.30  | 11.13  |
| 175 |    |                 | 3271 | Kota Bogor        | 21.35 | 19.07 | 23.82 | 2.28 | 1.58 | 3.19 | 24.00  | 0.70  | 192.10 | 120.40 | 13.98 | 1.20  | 25.38  | 3.56   |
| 176 |    |                 | 3272 | Kota Sukabumi     | 23.71 | 21.10 | 26.56 | 5.12 | 3.95 | 6.52 | 25.20  | 1.40  | 266.20 | 198.00 | 12.09 | 1.44  | 24.80  | 3.33   |
| 177 |    |                 | 3273 | Kota Bandung      | 5.11  | 4.27  | 6.07  | 0.87 | 0.54 | 1.33 | 22.30  | 0.85  | 202.20 | 199.20 | 15.97 | 2.99  | 34.30  | 6.39   |
| 178 |    |                 | 3274 | Kota Cirebon      | 8.53  | 7.00  | 10.29 | 1.71 | 1.03 | 2.65 | 43.90  | 2.07  | 348.90 | 289.90 | 12.62 | 3.00  | 16.93  | 4.83   |
| 179 |    |                 | 3275 | Kota Bekasi       | 13.01 | 11.54 | 14.61 | 3.72 | 2.97 | 4.60 | 13.10  | 0.37  | 111.00 | 59.60  | 15.99 | 3.42  | 25.41  | 7.45   |
| 180 |    |                 | 3276 | Depok             | 12.47 | 10.81 | 14.31 | 3.12 | 2.31 | 4.12 | 11.70  | 0.51  | 50.20  | 44.80  | 14.20 | 2.96  | 26.07  | 5.42   |
| 181 |    |                 | 3277 | Cimahi            | 14.27 | 12.34 | 16.42 | 4.42 | 3.38 | 5.69 | 25.10  | 0.67  | 198.10 | 163.40 | 11.49 | 1.72  | 23.46  | 3.57   |
| 182 |    |                 | 3278 | Kota Tasikmalaya  | 17.32 | 15.30 | 19.54 | 1.59 | 1.02 | 2.35 | 16.50  | 0.88  | 69.70  | 135.80 | 14.64 | 1.96  | 37.66  | 3.55   |
| 183 |    |                 | 3279 | Banjar            | 5.36  | 4.10  | 6.86  | 1.70 | 1.02 | 2.66 | 21.80  | 1.59  | 46.20  | 208.60 | 13.08 | 2.29  | 20.74  | 3.36   |

|     |    |               |      |                 |       |       |       |      |      |      |        |      |        |        |       |      |       |       |
|-----|----|---------------|------|-----------------|-------|-------|-------|------|------|------|--------|------|--------|--------|-------|------|-------|-------|
| 184 | 33 | Jawa Tengah   | 3301 | Cilacap         | 7.39  | 6.23  | 8.71  | 2.09 | 1.47 | 2.86 | 10.20  | 0.69 | 52.70  | 81.80  | 24.10 | 3.31 | 59.33 | 16.11 |
| 185 |    |               | 3302 | Banyumas        | 8.13  | 6.92  | 9.48  | 4.27 | 3.38 | 5.31 | 14.70  | 0.74 | 172.70 | 123.50 | 14.78 | 2.89 | 32.13 | 5.45  |
| 186 |    |               | 3303 | Purbalingga     | 12.86 | 11.15 | 14.75 | 2.83 | 2.05 | 3.79 | 10.90  | 0.77 | 71.10  | 73.80  | 17.08 | 3.29 | 41.27 | 10.02 |
| 187 |    |               | 3304 | Banjarnegara    | 8.97  | 7.45  | 10.69 | 3.04 | 2.20 | 4.09 | 9.00   | 1.19 | 54.00  | 50.90  | 17.49 | 4.51 | 49.67 | 10.64 |
| 188 |    |               | 3305 | Kebumen         | 8.16  | 6.89  | 9.59  | 3.02 | 2.24 | 3.96 | 10.90  | 0.89 | 100.40 | 86.40  | 15.32 | 2.17 | 37.78 | 5.15  |
| 189 |    |               | 3306 | Purworejo       | 5.19  | 4.07  | 6.50  | 2.66 | 1.85 | 3.68 | 24.10  | 1.15 | 106.70 | 160.40 | 21.43 | 3.52 | 47.35 | 7.22  |
| 190 |    |               | 3307 | Wonosobo        | 6.25  | 5.12  | 7.55  | 1.63 | 1.09 | 2.34 | 9.30   | 0.94 | 62.30  | 58.40  | 17.75 | 2.57 | 38.82 | 5.70  |
| 191 |    |               | 3308 | Magelang        | 11.64 | 10.09 | 13.36 | 2.54 | 1.84 | 3.40 | 11.90  | 0.73 | 21.10  | 36.40  | 15.09 | 1.91 | 30.67 | 3.91  |
| 192 |    |               | 3309 | Boyolali        | 11.31 | 9.72  | 13.08 | 5.16 | 4.09 | 6.41 | 14.80  | 0.92 | 114.90 | 82.20  | 21.48 | 2.77 | 33.88 | 7.08  |
| 193 |    |               | 3310 | Klaten          | 10.12 | 8.61  | 11.81 | 3.16 | 2.32 | 4.19 | 12.60  | 0.89 | 106.10 | 108.80 | 14.57 | 3.34 | 26.57 | 7.19  |
| 194 |    |               | 3311 | Sukoharjo       | 2.46  | 1.76  | 3.35  | 1.43 | 0.90 | 2.15 | 15.30  | 0.43 | 80.90  | 67.10  | 14.10 | 3.45 | 28.76 | 7.51  |
| 195 |    |               | 3312 | Wonogiri        | 10.45 | 8.91  | 12.16 | 2.95 | 2.16 | 3.91 | 14.10  | 1.08 | 79.20  | 75.00  | 14.82 | 2.22 | 36.72 | 8.53  |
| 196 |    |               | 3313 | Karanganyar     | 9.23  | 7.88  | 10.73 | 4.07 | 3.19 | 5.11 | 15.10  | 0.77 | 84.70  | 74.60  | 12.95 | 4.62 | 40.05 | 16.09 |
| 197 |    |               | 3314 | Sragen          | 6.55  | 5.37  | 7.90  | 2.76 | 2.01 | 3.69 | 17.70  | 0.86 | 119.10 | 83.30  | 15.18 | 3.58 | 32.75 | 8.08  |
| 198 |    |               | 3315 | Grobogan        | 9.60  | 8.24  | 11.10 | 2.58 | 1.90 | 3.42 | 10.70  | 0.68 | 78.10  | 80.20  | 18.33 | 3.23 | 52.86 | 6.90  |
| 199 |    |               | 3316 | Blora           | 3.93  | 3.07  | 4.95  | 1.24 | 0.79 | 1.85 | 13.10  | 0.93 | 72.70  | 68.60  | 20.26 | 5.17 | 50.03 | 26.71 |
| 200 |    |               | 3317 | Rembang         | 4.99  | 3.94  | 6.24  | 0.75 | 0.38 | 1.32 | 8.90   | 0.80 | 55.10  | 65.70  | 16.89 | 2.47 | 43.81 | 6.79  |
| 201 |    |               | 3318 | Pati            | 6.55  | 5.30  | 8.00  | 2.73 | 1.94 | 3.73 | 13.00  | 0.72 | 83.50  | 91.20  | 22.12 | 3.87 | 43.60 | 8.58  |
| 202 |    |               | 3319 | Kudus           | 12.03 | 10.50 | 13.73 | 2.09 | 1.49 | 2.85 | 19.90  | 0.72 | 170.40 | 144.00 | 11.83 | 1.83 | 38.68 | 3.65  |
| 203 |    |               | 3320 | Jepara          | 10.70 | 9.26  | 12.29 | 3.30 | 2.52 | 4.25 | 13.30  | 0.57 | 79.00  | 67.10  | 13.98 | 3.22 | 44.42 | 10.35 |
| 204 |    |               | 3321 | Demak           | 9.29  | 7.96  | 10.78 | 3.01 | 2.28 | 3.90 | 11.00  | 0.76 | 48.30  | 38.50  | 14.60 | 2.58 | 40.68 | 6.45  |
| 205 |    |               | 3322 | Semarang        | 9.03  | 7.67  | 10.57 | 3.59 | 2.76 | 4.57 | 14.50  | 0.83 | 74.20  | 76.80  | 13.01 | 2.12 | 33.94 | 4.73  |
| 206 |    |               | 3323 | Temanggung      | 7.27  | 6.05  | 8.66  | 2.15 | 1.51 | 2.97 | 11.70  | 1.00 | 78.60  | 90.20  | 17.51 | 2.62 | 35.29 | 11.17 |
| 207 |    |               | 3324 | Kendal          | 6.20  | 5.13  | 7.43  | 0.97 | 0.58 | 1.52 | 12.60  | 0.99 | 41.80  | 84.10  | 16.81 | 2.54 | 45.09 | 7.67  |
| 208 |    |               | 3325 | Batang          | 10.31 | 8.91  | 11.87 | 2.09 | 1.48 | 2.86 | 9.20   | 0.88 | 58.80  | 76.20  | 13.67 | 1.58 | 51.52 | 4.61  |
| 209 |    |               | 3326 | Pekalongan      | 10.00 | 8.51  | 11.67 | 2.05 | 1.39 | 2.91 | 11.30  | 0.92 | 93.80  | 72.60  | 14.83 | 1.79 | 45.19 | 7.10  |
| 210 |    |               | 3327 | Pemalang        | 7.28  | 6.05  | 8.68  | 2.80 | 2.04 | 3.76 | 9.90   | 0.52 | 63.30  | 57.70  | 19.28 | 4.11 | 44.27 | 34.43 |
| 211 |    |               | 3328 | Tegal           | 16.48 | 14.61 | 18.51 | 2.35 | 1.66 | 3.22 | 6.40   | 0.62 | 57.80  | 41.30  | 20.24 | 2.73 | 50.67 | 10.71 |
| 212 |    |               | 3329 | Brebes          | 8.81  | 7.49  | 10.28 | 1.37 | 0.88 | 2.03 | 8.00   | 0.65 | 46.40  | 43.80  | 21.03 | 4.23 | 46.00 | 13.95 |
| 213 |    |               | 3371 | Kota Magelang   | 15.91 | 13.54 | 18.55 | 5.36 | 4.01 | 7.00 | 83.60  | 1.25 | #####  | 758.70 | 8.90  | 1.04 | 13.33 | 1.93  |
| 214 |    |               | 3372 | Surakarta       | 10.51 | 8.92  | 12.29 | 3.58 | 2.67 | 4.69 | 63.30  | 1.01 | 625.80 | 535.00 | 9.50  | 1.58 | 16.22 | 3.01  |
| 215 |    |               | 3373 | Salatiga        | 17.18 | 14.83 | 19.78 | 4.21 | 3.08 | 5.59 | 74.80  | 1.04 | 441.40 | 305.10 | 9.93  | 1.36 | 14.28 | 2.19  |
| 216 |    |               | 3374 | Kota Semarang   | 10.26 | 8.96  | 11.70 | 3.95 | 3.15 | 4.88 | 73.50  | 0.70 | 305.40 | 226.00 | 12.49 | 2.74 | 31.71 | 6.28  |
| 217 |    |               | 3375 | Kota Pekalongan | 9.99  | 8.38  | 11.82 | 2.43 | 1.66 | 3.43 | 25.60  | 1.47 | 178.00 | 107.10 | 11.35 | 2.69 | 17.44 | 4.29  |
| 218 |    |               | 3376 | Kota Tegal      | 12.34 | 10.45 | 14.48 | 1.89 | 1.19 | 2.83 | 33.40  | 0.99 | 362.40 | 325.70 | 12.83 | 3.11 | 22.07 | 6.13  |
| 219 | 34 | DI Yogyakarta | 3401 | Kulonprogo      | 17.88 | 15.80 | 20.14 | 4.52 | 3.48 | 5.76 | 23.30  | 1.56 | 126.90 | 109.10 | 14.08 | 1.77 | 25.71 | 4.21  |
| 220 |    |               | 3402 | Bantul          | 13.64 | 11.92 | 15.52 | 4.10 | 3.19 | 5.19 | 29.80  | 0.85 | 88.20  | 103.40 | 13.40 | 2.16 | 21.67 | 3.93  |
| 221 |    |               | 3403 | Gunung Kidul    | 13.76 | 11.93 | 15.77 | 2.88 | 2.11 | 3.81 | 28.50  | 1.28 | 43.70  | 97.00  | 14.26 | 2.50 | 32.57 | 8.82  |
| 222 |    |               | 3404 | Sleman          | 12.89 | 11.24 | 14.70 | 3.36 | 2.54 | 4.36 | 33.50  | 0.66 | 571.60 | 204.30 | 14.70 | 3.05 | 29.54 | 5.51  |
| 223 |    |               | 3471 | Yogyakarta      | 13.49 | 11.65 | 15.53 | 5.17 | 4.05 | 6.50 | 108.70 | 1.34 | 568.80 | 573.00 | 8.64  | 2.05 | 14.59 | 4.42  |
| 224 | 35 | Jawa Timur    | 3501 | Pacitan         | 6.27  | 5.07  | 7.65  | 2.59 | 1.79 | 3.60 | 12.00  | 1.29 | 35.10  | 85.20  | 19.23 | 3.02 | 71.60 | 20.85 |
| 225 |    |               | 3502 | Ponorogo        | 6.40  | 5.27  | 7.69  | 1.75 | 1.22 | 2.42 | 9.70   | 1.06 | 94.50  | 103.50 | 20.07 | 3.72 | 42.57 | 10.86 |
| 226 |    |               | 3503 | Trenggalek      | 6.53  | 5.38  | 7.84  | 1.42 | 0.93 | 2.05 | 12.80  | 0.95 | 66.80  | 84.10  | 15.18 | 3.03 | 47.00 | 8.65  |
| 227 |    |               | 3504 | Tulungagung     | 6.43  | 5.32  | 7.69  | 1.71 | 1.16 | 2.40 | 9.80   | 0.91 | 90.20  | 93.30  | 14.54 | 2.35 | 35.37 | 8.16  |
| 228 |    |               | 3505 | Blitar          | 7.70  | 6.50  | 9.06  | 2.56 | 1.88 | 3.39 | 6.30   | 0.63 | 42.10  | 41.60  | 16.49 | 2.46 | 33.82 | 6.49  |
| 229 |    |               | 3506 | Kediri          | 9.30  | 8.05  | 10.69 | 2.31 | 1.71 | 3.04 | 8.50   | 0.72 | 53.40  | 69.30  | 15.00 | 2.71 | 37.22 | 7.13  |
| 230 |    |               | 3507 | Malang          | 6.77  | 5.77  | 7.89  | 2.37 | 1.78 | 3.08 | 10.00  | 0.47 | 90.00  | 44.00  | 16.25 | 2.79 | 38.47 | 8.86  |
| 231 |    |               | 3508 | Lumajang        | 7.81  | 6.60  | 9.17  | 2.03 | 1.43 | 2.79 | 10.00  | 0.72 | 50.40  | 68.30  | 18.21 | 3.23 | 39.96 | 9.07  |

|     |    |                     |      |                   |       |       |       |      |      |      |       |      |        |        |       |      |        |       |
|-----|----|---------------------|------|-------------------|-------|-------|-------|------|------|------|-------|------|--------|--------|-------|------|--------|-------|
| 232 |    |                     | 3509 | Jember            | 7.17  | 6.18  | 8.28  | 1.49 | 1.07 | 2.03 | 8.60  | 0.61 | 63.30  | 55.80  | 18.03 | 3.87 | 47.31  | 9.82  |
| 233 |    |                     | 3510 | Banyuwangi        | 8.62  | 7.46  | 9.90  | 2.65 | 2.01 | 3.44 | 7.10  | 0.84 | 71.00  | 52.40  | 15.16 | 3.02 | 40.57  | 8.10  |
| 234 |    |                     | 3511 | Bondowoso         | 6.39  | 5.20  | 7.75  | 0.93 | 0.53 | 1.52 | 9.10  | 0.99 | 37.60  | 131.80 | 21.07 | 5.42 | 30.38  | 6.86  |
| 235 |    |                     | 3512 | Situbondo         | 7.65  | 6.39  | 9.09  | 2.93 | 2.16 | 3.87 | 8.00  | 0.77 | 60.10  | 75.40  | 16.54 | 2.52 | 48.83  | 6.59  |
| 236 |    |                     | 3513 | Probolinggo       | 7.02  | 5.89  | 8.29  | 1.75 | 1.21 | 2.45 | 6.10  | 0.88 | 61.50  | 51.20  | 17.27 | 3.18 | 36.54  | 6.78  |
| 237 |    |                     | 3514 | Pasuruan          | 6.44  | 5.43  | 7.59  | 1.46 | 1.00 | 2.06 | 6.00  | 0.64 | 45.30  | 27.10  | 19.63 | 3.33 | 37.30  | 7.36  |
| 238 |    |                     | 3515 | Sidoarjo          | 11.84 | 10.53 | 13.27 | 4.09 | 3.34 | 4.96 | 13.80 | 0.39 | 114.20 | 78.60  | 13.07 | 1.70 | 31.01  | 4.90  |
| 239 |    |                     | 3516 | Mojokerto         | 6.04  | 4.95  | 7.28  | 2.01 | 1.40 | 2.78 | 13.90 | 0.77 | 112.50 | 107.80 | 16.36 | 3.94 | 36.93  | 7.74  |
| 240 |    |                     | 3517 | Jombang           | 9.59  | 8.26  | 11.07 | 2.32 | 1.69 | 3.11 | 13.30 | 0.83 | 89.50  | 87.20  | 12.51 | 2.64 | 32.52  | 5.86  |
| 241 |    |                     | 3518 | Nganjuk           | 5.45  | 4.47  | 6.58  | 1.20 | 0.76 | 1.80 | 11.70 | 0.57 | 57.60  | 61.30  | 20.91 | 3.77 | 38.56  | 8.26  |
| 242 |    |                     | 3519 | Madiun            | 7.16  | 5.86  | 8.65  | 2.29 | 1.59 | 3.17 | 23.60 | 1.15 | 66.20  | 172.40 | 17.24 | 3.05 | 29.96  | 6.77  |
| 243 |    |                     | 3520 | Magetan           | 9.48  | 8.08  | 11.04 | 2.24 | 1.59 | 3.05 | 8.50  | 1.03 | 77.10  | 60.50  | 13.51 | 1.97 | 35.92  | 9.18  |
| 244 |    |                     | 3521 | Ngawi             | 8.90  | 7.54  | 10.42 | 3.14 | 2.30 | 4.18 | 10.10 | 0.86 | 46.50  | 96.10  | 13.97 | 2.15 | 37.73  | 16.22 |
| 245 |    |                     | 3522 | Bojonegoro        | 6.20  | 5.19  | 7.33  | 1.97 | 1.43 | 2.65 | 8.50  | 0.87 | 71.10  | 57.80  | 17.25 | 3.19 | 37.92  | 5.86  |
| 246 |    |                     | 3523 | Tuban             | 5.61  | 4.66  | 6.69  | 1.47 | 1.01 | 2.07 | 6.30  | 0.86 | 71.80  | 40.00  | 17.57 | 1.92 | 47.79  | 7.74  |
| 247 |    |                     | 3524 | Lamongan          | 8.77  | 7.55  | 10.13 | 1.99 | 1.43 | 2.70 | 8.20  | 0.82 | 46.00  | 69.90  | 21.87 | 5.43 | 46.63  | 11.49 |
| 248 |    |                     | 3525 | Gresik            | 13.39 | 11.82 | 15.10 | 3.61 | 2.83 | 4.56 | 12.60 | 0.79 | 70.10  | 60.80  | 16.75 | 3.07 | 36.92  | 7.21  |
| 249 |    |                     | 3526 | Bangkalan         | 2.80  | 2.03  | 3.74  | 0.94 | 0.52 | 1.56 | 7.30  | 0.71 | 37.50  | 62.50  | 19.04 | 3.69 | 44.20  | 8.89  |
| 250 |    |                     | 3527 | Sampang           | 7.54  | 6.24  | 9.03  | 2.37 | 1.68 | 3.26 | 5.00  | 0.70 | 19.30  | 46.80  | 18.07 | 2.52 | 64.08  | 9.41  |
| 251 |    |                     | 3528 | Pamekasan         | 5.11  | 4.08  | 6.32  | 0.85 | 0.46 | 1.43 | 7.50  | 0.73 | 36.30  | 69.50  | 24.10 | 3.87 | 26.51  | 7.28  |
| 252 |    |                     | 3529 | Sumenep           | 8.23  | 6.95  | 9.67  | 1.37 | 0.89 | 2.02 | 6.40  | 0.84 | 23.30  | 65.40  | 21.00 | 2.60 | 119.90 | 15.84 |
| 253 |    |                     | 3571 | Kota Kediri       | 8.60  | 7.16  | 10.25 | 1.90 | 1.27 | 2.74 | 35.10 | 0.98 | 495.90 | 348.50 | 9.49  | 3.19 | 19.66  | 5.30  |
| 254 |    |                     | 3572 | Kota Blitar       | 13.04 | 10.92 | 15.43 | 3.55 | 2.50 | 4.89 | 45.70 | 0.66 | 430.40 | 261.70 | 8.32  | 2.26 | 12.62  | 3.08  |
| 255 |    |                     | 3573 | Kota Malang       | 8.86  | 7.57  | 10.31 | 1.79 | 1.25 | 2.49 | 23.20 | 0.53 | 308.20 | 241.00 | 10.31 | 1.56 | 17.77  | 2.80  |
| 256 |    |                     | 3574 | Kota Probolinggo  | 13.25 | 11.28 | 15.46 | 1.96 | 1.26 | 2.91 | 17.90 | 0.85 | 142.50 | 145.60 | 13.12 | 2.16 | 22.48  | 3.64  |
| 257 |    |                     | 3575 | Kota Pasuruan     | 12.68 | 10.68 | 14.95 | 3.97 | 2.89 | 5.30 | 29.80 | 1.21 | 141.50 | 230.80 | 11.40 | 1.44 | 16.68  | 2.95  |
| 258 |    |                     | 3576 | Kota Mojokerto    | 15.77 | 13.45 | 18.38 | 4.77 | 3.52 | 6.31 | 28.30 | 1.21 | 577.80 | 165.10 | 11.17 | 1.74 | 16.33  | 2.84  |
| 259 |    |                     | 3577 | Kota Madiun       | 9.52  | 7.89  | 11.36 | 3.41 | 2.46 | 4.61 | 20.50 | 1.02 | 527.40 | 46.70  | 9.23  | 2.22 | 15.66  | 4.02  |
| 260 |    |                     | 3578 | Surabaya          | 15.39 | 13.85 | 17.05 | 4.29 | 3.49 | 5.22 | 25.40 | 0.65 | 293.70 | 188.50 | 8.92  | 1.64 | 20.96  | 4.79  |
| 261 |    |                     | 3579 | Batu              | 10.74 | 8.98  | 12.73 | 2.32 | 1.55 | 3.32 | 32.70 | 0.77 | 149.60 | 138.60 | 10.80 | 1.50 | 15.45  | 2.00  |
| 262 | 36 | Banten              | 3601 | Pandeglang        | 7.60  | 6.37  | 9.00  | 0.71 | 0.37 | 1.21 | 4.70  | 0.84 | 17.40  | 62.70  | 23.52 | 4.53 | 73.92  | 13.45 |
| 263 |    |                     | 3602 | Lebak             | 6.16  | 5.14  | 7.32  | 1.26 | 0.83 | 1.84 | 8.20  | 0.90 | 47.50  | 57.30  | 14.40 | 4.65 | 54.65  | 11.85 |
| 264 |    |                     | 3603 | Tangerang         | 8.41  | 7.25  | 9.69  | 2.60 | 1.99 | 3.34 | 8.50  | 0.41 | 62.90  | 38.50  | 24.59 | 4.10 | 53.39  | 17.63 |
| 265 |    |                     | 3604 | Serang            | 6.25  | 5.15  | 7.50  | 0.88 | 0.51 | 1.41 | 9.50  | 0.60 | 42.50  | 94.00  | 21.93 | 5.99 | 59.03  | 17.37 |
| 266 |    |                     | 3671 | Kota Tangerang    | 10.08 | 8.63  | 11.69 | 3.15 | 2.36 | 4.10 | 14.40 | 0.48 | 150.50 | 74.70  | 11.19 | 1.93 | 25.65  | 4.30  |
| 267 |    |                     | 3672 | Cilegon           | 10.17 | 8.45  | 12.13 | 2.77 | 1.94 | 3.83 | 23.30 | 0.58 | 130.70 | 101.50 | 14.47 | 4.95 | 29.61  | 10.20 |
| 268 |    |                     | 3673 | Kota Serang       | 8.25  | 6.71  | 10.02 | 2.25 | 1.42 | 3.35 | 16.30 | 0.75 | 53.20  | 81.20  | 12.47 | 3.87 | 29.14  | 6.65  |
| 269 |    |                     | 3674 | Tangerang Selatan | 5.20  | 4.24  | 6.32  | 1.65 | 1.13 | 2.32 | 17.00 | 0.52 | 106.00 | 82.90  | 15.27 | 5.17 | 26.34  | 8.70  |
| 270 | 51 | Bali                | 5101 | Jembrana          | 11.66 | 9.83  | 13.73 | 2.26 | 1.46 | 3.32 | 9.20  | 1.06 | 112.60 | 45.80  | 13.90 | 1.94 | 27.45  | 9.01  |
| 271 |    |                     | 5102 | Tabanan           | 14.33 | 12.50 | 16.35 | 3.62 | 2.72 | 4.72 | 31.90 | 1.31 | 136.10 | 157.10 | 10.76 | 2.14 | 34.38  | 7.04  |
| 272 |    |                     | 5103 | Badung            | 12.24 | 10.55 | 14.11 | 2.89 | 2.09 | 3.88 | 27.50 | 0.66 | 66.40  | 111.50 | 12.23 | 2.66 | 37.41  | 7.46  |
| 273 |    |                     | 5104 | Gianyar           | 1.79  | 1.26  | 2.47  | 1.38 | 0.93 | 1.98 | 7.30  | 0.76 | 82.70  | 238.70 | 12.39 | 8.61 | 33.37  | 24.36 |
| 274 |    |                     | 5105 | Klungkung         | 16.26 | 14.11 | 18.63 | 2.53 | 1.71 | 3.60 | 37.30 | 1.46 | 106.90 | 204.10 | 14.94 | 2.58 | 27.36  | 7.68  |
| 275 |    |                     | 5106 | Bangli            | 12.09 | 10.33 | 14.06 | 3.96 | 2.95 | 5.20 | 37.20 | 1.54 | 294.20 | 238.20 | 13.74 | 2.66 | 31.73  | 11.30 |
| 276 |    |                     | 5107 | Karang Asem       | 7.41  | 6.07  | 8.95  | 1.58 | 1.01 | 2.33 | 17.20 | 0.84 | 33.20  | 42.50  | 20.37 | 3.38 | 43.89  | 8.90  |
| 277 |    |                     | 5108 | Buleleng          | 9.55  | 8.09  | 11.20 | 2.67 | 1.95 | 3.56 | 15.90 | 0.89 | 116.70 | 80.10  | 20.30 | 5.77 | 61.44  | 18.97 |
| 278 |    |                     | 5171 | Denpasar          | 8.64  | 7.26  | 10.20 | 2.65 | 1.91 | 3.57 | 38.90 | 0.39 | 295.50 | 242.10 | 11.34 | 1.61 | 17.93  | 2.64  |
| 279 | 52 | Nusa Tenggara Barat | 5201 | Lombok Barat      | 5.62  | 4.48  | 6.97  | 2.04 | 1.39 | 2.90 | 10.40 | 0.81 | 30.00  | 58.50  | 19.46 | 3.25 | 30.10  | 8.01  |

|     |    |                     |      |                      |       |       |       |       |      |       |       |      |        |        |       |       |        |        |
|-----|----|---------------------|------|----------------------|-------|-------|-------|-------|------|-------|-------|------|--------|--------|-------|-------|--------|--------|
| 280 |    |                     | 5202 | Lombok Tengah        | 8.61  | 7.13  | 10.28 | 0.91  | 0.50 | 1.50  | 6.90  | 0.83 | 50.70  | 80.40  | 15.78 | 3.46  | 41.79  | 12.99  |
| 281 |    |                     | 5203 | Lombok Timur         | 7.07  | 5.82  | 8.51  | 1.68  | 1.11 | 2.44  | 7.50  | 0.75 | 37.00  | 82.70  | 17.10 | 3.54  | 36.76  | 9.19   |
| 282 |    |                     | 5204 | Sumbawa              | 6.15  | 4.95  | 7.56  | 1.21  | 0.70 | 1.94  | 19.10 | 1.73 | 32.90  | 117.20 | 21.74 | 5.38  | 88.77  | 10.48  |
| 283 |    |                     | 5205 | Dompu                | 8.96  | 7.29  | 10.89 | 3.91  | 2.84 | 5.25  | 8.30  | 1.18 | 77.80  | 111.90 | 14.86 | 3.65  | 61.49  | 10.17  |
| 284 |    |                     | 5206 | Bima                 | 7.58  | 6.24  | 9.11  | 1.09  | 0.62 | 1.78  | 10.90 | 1.31 | 77.30  | 87.60  | 14.57 | 2.79  | 85.19  | 13.87  |
| 285 |    |                     | 5207 | Sumbawa Barat        | 2.97  | 2.02  | 4.21  | 0.91  | 0.43 | 1.69  | 23.30 | 2.25 | 44.10  | 333.00 | 13.48 | 6.73  | 33.57  | 16.29  |
| 286 |    |                     | 5208 | Lombok Utara         | 4.28  | 3.15  | 5.69  | 1.89  | 1.16 | 2.89  | 10.00 | 1.15 | 39.20  | 67.00  | 22.34 | 5.40  | 52.39  | 13.54  |
| 287 |    |                     | 5271 | Mataram              | 9.31  | 7.76  | 11.08 | 1.87  | 1.21 | 2.75  | 44.20 | 0.78 | 270.30 | 254.20 | 10.98 | 3.86  | 14.54  | 5.64   |
| 288 |    |                     | 5272 | Bima                 | 5.75  | 4.40  | 7.38  | 2.87  | 1.96 | 4.06  | 20.10 | 1.31 | 100.70 | 147.00 | 24.09 | 4.17  | 19.67  | 4.55   |
| 289 | 53 | Nusa Tenggara Timur | 5301 | Sumba Barat          | 13.87 | 11.65 | 16.39 | 10.95 | 8.94 | 13.26 | 23.30 | 1.75 | 360.30 | 179.80 | 36.82 | 5.81  | 62.63  | 9.13   |
| 290 |    |                     | 5302 | Sumba Timur          | 9.74  | 7.98  | 11.77 | 5.93  | 4.61 | 7.52  | 17.00 | 2.68 | 149.30 | 133.00 | 45.85 | 5.45  | 76.18  | 11.81  |
| 291 |    |                     | 5303 | Kupang               | 19.11 | 16.81 | 21.64 | 0.85  | 0.44 | 1.49  | 21.80 | 2.37 | 166.80 | 131.90 | 38.20 | 4.30  | 70.65  | 16.83  |
| 292 |    |                     | 5304 | Timor Tengah Selatan | 8.44  | 6.91  | 10.20 | 1.05  | 0.55 | 1.80  | 10.50 | 1.88 | 20.50  | 62.40  | 38.50 | 4.84  | 46.95  | 9.00   |
| 293 |    |                     | 5305 | Timor Tengah Utara   | 5.00  | 3.75  | 6.52  | 2.33  | 1.49 | 3.46  | 4.00  | 3.14 | 70.70  | 170.80 | 18.40 | 3.96  | 41.73  | 5.88   |
| 294 |    |                     | 5306 | Belu                 | 11.91 | 10.24 | 13.76 | 0.73  | 0.37 | 1.29  | 15.20 | 2.67 | 120.10 | 176.70 | 38.18 | 6.32  | 39.49  | 8.85   |
| 295 |    |                     | 5307 | Alor                 | 7.03  | 5.52  | 8.82  | 0.64  | 0.25 | 1.32  | 18.00 | 3.50 | 82.10  | 133.20 | 23.05 | 2.54  | 74.36  | 5.97   |
| 296 |    |                     | 5308 | Lembata              | 10.42 | 8.49  | 12.66 | 2.07  | 1.26 | 3.21  | 14.10 | 2.12 | 114.50 | 235.20 | 25.06 | 4.97  | 90.85  | 9.78   |
| 297 |    |                     | 5309 | Flores Timur         | 7.00  | 5.56  | 8.69  | 1.42  | 0.83 | 2.26  | 13.90 | 2.38 | 68.30  | 146.50 | 24.18 | 3.96  | 37.41  | 16.75  |
| 298 |    |                     | 5310 | Sikka                | 10.02 | 8.48  | 11.75 | 2.79  | 2.03 | 3.74  | 10.50 | 2.12 | 101.80 | 117.80 | 22.35 | 3.45  | 18.53  | 2.27   |
| 299 |    |                     | 5311 | Ende                 | 10.48 | 8.70  | 12.51 | 2.40  | 1.60 | 3.44  | 12.80 | 2.55 | 78.00  | 108.50 | 17.02 | 3.36  | 26.88  | 4.08   |
| 300 |    |                     | 5312 | Ngada                | 7.43  | 5.62  | 9.61  | 1.86  | 1.10 | 2.93  | 16.20 | 2.72 | 86.30  | 147.30 | 35.99 | 6.33  | 53.92  | 53.47  |
| 301 |    |                     | 5313 | Manggarai            | 6.77  | 5.39  | 8.39  | 1.66  | 0.99 | 2.59  | 5.40  | 1.99 | 86.50  | 108.30 | 19.30 | 3.46  | 48.88  | 5.38   |
| 302 |    |                     | 5314 | Rote Ndao            | 13.09 | 10.91 | 15.57 | 1.00  | 0.47 | 1.82  | 22.30 | 2.77 | 0.00   | 97.10  | 35.18 | 5.75  | 59.41  | 22.77  |
| 303 |    |                     | 5315 | Manggarai Barat      | 7.21  | 5.68  | 9.03  | 0.24  | 0.05 | 0.72  | 11.20 | 1.87 | 0.00   | 112.10 | 22.70 | 2.82  | 114.29 | 12.86  |
| 304 |    |                     | 5316 | Sumba Tengah         | 24.56 | 21.63 | 27.76 | 4.10  | 2.93 | 5.58  | 26.60 | 3.55 | 54.70  | 149.30 | 69.87 | 11.05 | 45.63  | 12.11  |
| 305 |    |                     | 5317 | Sumba Barat Daya     | 6.81  | 5.34  | 8.55  | 5.93  | 4.57 | 7.58  | 6.20  | 0.97 | 0.00   | 86.20  | 31.24 | 3.30  | 56.70  | 6.32   |
| 306 |    |                     | 5318 | Nagekeo              | 5.69  | 4.33  | 7.33  | 0.99  | 0.48 | 1.76  | 11.40 | 1.49 | 0.00   | 194.50 | 24.59 | 5.01  | 165.32 | 100.45 |
| 307 |    |                     | 5319 | Manggarai Timur      | 3.11  | 2.17  | 4.30  | 0.61  | 0.24 | 1.28  | 11.30 | 2.41 | 0.00   | 55.90  | 47.10 | 3.94  | 277.71 | 39.52  |
| 308 |    |                     | 5320 | Sabu Raijua          | 9.74  | 7.67  | 12.17 | 0.30  | 0.03 | 1.08  | 2.50  | 2.28 | 67.10  | 34.20  | 59.02 | 4.74  | 58.10  | 16.56  |
| 309 |    |                     | 5371 | Kota Kupang          | 10.43 | 8.72  | 12.37 | 3.13  | 2.24 | 4.25  | 22.80 | 0.82 | 151.60 | 172.50 | 18.64 | 4.28  | 41.16  | 12.32  |
| 310 | 61 | Kalimantan Barat    | 6101 | Sambas               | 5.48  | 4.31  | 6.87  | 0.61  | 0.27 | 1.17  | 4.90  | 1.58 | 69.60  | 152.60 | 18.83 | 4.11  | 65.38  | 12.52  |
| 311 |    |                     | 6102 | Bengkayang           | 5.52  | 4.22  | 7.08  | 1.48  | 0.84 | 2.40  | 16.20 | 2.29 | 102.90 | 267.70 | 23.58 | 7.06  | 79.48  | 42.35  |
| 312 |    |                     | 6103 | Landak               | 6.41  | 4.98  | 8.11  | 1.24  | 0.57 | 2.25  | 7.60  | 1.41 | 19.10  | 174.80 | 40.41 | 13.90 | 129.09 | 47.11  |
| 313 |    |                     | 6104 | Pontianak            | 10.49 | 8.79  | 12.41 | 2.36  | 1.61 | 3.34  | 8.70  | 1.74 | 47.10  | 142.10 | 20.64 | 6.17  | 39.64  | 18.20  |
| 314 |    |                     | 6105 | Sanggau              | 2.45  | 1.65  | 3.49  | 0.85  | 0.42 | 1.54  | 11.40 | 1.28 | 68.60  | 165.00 | 21.65 | 8.85  | 118.10 | 60.80  |
| 315 |    |                     | 6106 | Ketapang             | 4.18  | 3.12  | 5.46  | 0.25  | 0.07 | 0.64  | 11.10 | 1.63 | 45.50  | 274.80 | 20.62 | 10.38 | 95.01  | 146.54 |
| 316 |    |                     | 6107 | Sintang              | 1.99  | 1.30  | 2.90  | 0.45  | 0.19 | 0.86  | 11.90 | 1.59 | 61.80  | 171.00 | 45.31 | 57.44 | 72.44  | 60.31  |
| 317 |    |                     | 6108 | Kapuas Hulu          | 2.30  | 1.49  | 3.38  | 1.03  | 0.48 | 1.88  | 15.20 | 3.00 | 62.70  | 322.50 | 24.30 | 10.28 | 112.88 | 90.13  |
| 318 |    |                     | 6109 | Sekadaw              | 1.88  | 1.16  | 2.87  | 1.08  | 0.55 | 1.88  | 12.20 | 1.92 | 57.00  | 192.20 | 28.66 | 10.26 | 89.20  | 29.80  |
| 319 |    |                     | 6110 | Melawi               | 3.30  | 2.31  | 4.58  | 0.95  | 0.45 | 1.76  | 14.10 | 1.79 | 37.90  | 233.40 | 33.49 | 16.13 | 18.60  | 11.60  |
| 320 |    |                     | 6111 | Kayong Utara         | 7.34  | 5.72  | 9.26  | 0.09  | 0.00 | 0.49  | 10.10 | 2.43 | 0.00   | 309.50 | 16.22 | 5.45  | 185.46 | 31.10  |
| 321 |    |                     | 6112 | Kubu Raya            | 2.69  | 1.91  | 3.68  | 0.64  | 0.30 | 1.18  | 8.90  | 1.16 | 20.50  | 123.50 | 20.91 | 4.24  | 60.11  | 17.10  |
| 322 |    |                     | 6171 | Kota Pontianak       | 4.61  | 3.62  | 5.79  | 0.60  | 0.27 | 1.15  | 26.80 | 1.20 | 358.30 | 237.00 | 19.36 | 4.16  | 34.68  | 8.02   |
| 323 |    |                     | 6172 | Singkawang           | 7.49  | 6.03  | 9.19  | 3.04  | 2.14 | 4.18  | 38.90 | 0.78 | 558.00 | 388.90 | 12.28 | 3.07  | 21.48  | 5.20   |
| 324 | 62 | Kalimantan Tengah   | 6201 | Kotawaringin Barat   | 5.74  | 4.20  | 7.61  | 1.68  | 0.97 | 2.69  | 21.00 | 1.90 | 81.60  | 138.20 | 22.97 | 6.17  | 37.82  | 12.88  |
| 325 |    |                     | 6202 | Kotawaringin Timur   | 4.46  | 3.26  | 5.94  | 1.73  | 0.98 | 2.81  | 12.20 | 1.50 | 62.90  | 137.00 | 15.85 | 5.03  | 50.10  | 27.69  |
| 326 |    |                     | 6203 | Kapuas               | 4.54  | 3.40  | 5.93  | 1.11  | 0.59 | 1.90  | 14.20 | 2.21 | 41.10  | 135.70 | 17.43 | 4.57  | 42.09  | 23.82  |
| 327 |    |                     | 6204 | Barito Selatan       | 3.55  | 2.42  | 5.01  | 1.14  | 0.57 | 2.05  | 20.30 | 2.71 | 118.90 | 276.10 | 9.36  | 4.57  | 36.75  | 12.25  |

|     |    |                    |      |                        |       |       |       |      |      |      |       |      |        |        |       |       |        |        |
|-----|----|--------------------|------|------------------------|-------|-------|-------|------|------|------|-------|------|--------|--------|-------|-------|--------|--------|
| 328 |    |                    | 6205 | Barito Utara           | 3.25  | 2.08  | 4.81  | 1.26 | 0.59 | 2.31 | 23.80 | 3.69 | 70.70  | 246.60 | 7.11  | 6.90  | 57.18  | 72.00  |
| 329 |    |                    | 6206 | Sukamara               | 10.48 | 8.11  | 13.29 | 2.02 | 1.06 | 3.46 | 39.50 | 3.12 | 0.00   | 270.10 | 8.69  | 5.30  | 34.00  | 29.71  |
| 330 |    |                    | 6207 | Lamandau               | 7.21  | 5.55  | 9.22  | 0.34 | 0.09 | 0.88 | 25.10 | 4.88 | 172.90 | 446.30 | 10.90 | 2.68  | 40.70  | 13.90  |
| 331 |    |                    | 6208 | Seruyan                | 4.77  | 3.44  | 6.44  | 1.32 | 0.69 | 2.27 | 15.40 | 2.40 | 62.10  | 156.20 | 17.22 | 5.97  | 53.30  | 20.57  |
| 332 |    |                    | 6209 | Katingan               | 8.03  | 6.28  | 10.11 | 2.31 | 1.39 | 3.58 | 11.50 | 3.06 | 70.20  | 186.20 | 20.91 | 8.81  | 80.81  | 52.83  |
| 333 |    |                    | 6210 | Pulang Pisau           | 1.66  | 0.93  | 2.74  | 0.67 | 0.24 | 1.46 | 19.40 | 2.57 | 52.10  | 121.30 | 16.03 | 6.42  | 66.72  | 128.06 |
| 334 |    |                    | 6211 | Gunung Mas             | 2.52  | 1.48  | 4.01  | 0.72 | 0.23 | 1.69 | 24.10 | 4.33 | 49.10  | 259.00 | 25.97 | 21.94 | 170.89 | 115.77 |
| 335 |    |                    | 6212 | Barito Timur           | 4.13  | 2.92  | 5.66  | 1.54 | 0.83 | 2.58 | 28.80 | 3.17 | 76.70  | 282.90 | 10.26 | 7.20  | 28.71  | 63.19  |
| 336 |    |                    | 6213 | Murung Raya            | 9.41  | 7.03  | 12.25 | 0.79 | 0.31 | 1.64 | 20.20 | 4.05 | 67.50  | 281.50 | 21.25 | 30.07 | 132.23 | 450.43 |
| 337 |    |                    | 6271 | Palangka Raya          | 6.99  | 5.25  | 9.07  | 3.03 | 1.89 | 4.56 | 33.40 | 1.27 | 194.00 | 239.60 | 17.47 | 5.19  | 30.15  | 11.06  |
| 338 | 63 | Kalimantan Selatan | 6301 | Tanah Laut             | 5.27  | 4.08  | 6.69  | 3.10 | 2.20 | 4.23 | 16.90 | 1.69 | 43.80  | 173.50 | 14.82 | 3.92  | 50.13  | 14.98  |
| 339 |    |                    | 6302 | Kota Baru              | 11.38 | 9.42  | 13.63 | 2.86 | 1.94 | 4.04 | 19.20 | 2.59 | 34.50  | 155.20 | 24.18 | 5.75  | 68.66  | 25.45  |
| 340 |    |                    | 6303 | Banjarnegara           | 5.86  | 4.64  | 7.30  | 2.07 | 1.36 | 3.03 | 12.20 | 1.26 | 77.50  | 153.90 | 21.00 | 3.74  | 38.64  | 10.83  |
| 341 |    |                    | 6304 | Barito Kuala           | 2.79  | 1.91  | 3.93  | 1.15 | 0.64 | 1.90 | 8.10  | 1.91 | 187.20 | 91.60  | 26.57 | 3.90  | 60.63  | 14.45  |
| 342 |    |                    | 6305 | Tapin                  | 8.32  | 6.68  | 10.23 | 2.23 | 1.41 | 3.33 | 23.20 | 2.15 | 63.50  | 178.80 | 15.53 | 2.86  | 48.67  | 8.97   |
| 343 |    |                    | 6306 | Hulu Sungai Selatan    | 5.67  | 4.34  | 7.28  | 3.17 | 2.20 | 4.44 | 16.60 | 2.75 | 90.70  | 150.00 | 14.24 | 3.20  | 31.81  | 7.58   |
| 344 |    |                    | 6307 | Hulu Sungai Tengah     | 4.23  | 3.19  | 5.50  | 2.10 | 1.39 | 3.05 | 9.90  | 2.17 | 84.10  | 101.60 | 11.67 | 3.04  | 21.87  | 4.47   |
| 345 |    |                    | 6308 | Hulu Sungai Utara      | 3.30  | 2.29  | 4.58  | 1.56 | 0.92 | 2.48 | 8.00  | 1.73 | 85.00  | 79.70  | 11.90 | 2.46  | 19.45  | 4.54   |
| 346 |    |                    | 6309 | Tabalong               | 1.79  | 1.08  | 2.79  | 1.12 | 0.57 | 1.97 | 22.00 | 2.03 | 74.20  | 101.70 | 15.42 | 2.95  | 23.91  | 6.03   |
| 347 |    |                    | 6310 | Tanah Bumbu            | 3.04  | 2.16  | 4.16  | 1.55 | 0.94 | 2.40 | 17.60 | 1.45 | 41.20  | 96.10  | 17.63 | 3.99  | 31.99  | 7.76   |
| 348 |    |                    | 6311 | Balangan               | 5.54  | 4.11  | 7.30  | 3.83 | 2.54 | 5.50 | 29.70 | 2.72 | 95.60  | 230.80 | 15.15 | 3.53  | 40.96  | 13.84  |
| 349 |    |                    | 6371 | Banjarmasin            | 4.94  | 3.71  | 6.43  | 3.07 | 2.23 | 4.13 | 34.80 | 1.16 | 264.10 | 276.10 | 11.94 | 4.40  | 24.63  | 6.96   |
| 350 |    |                    | 6372 | Banjarnegara           | 3.82  | 2.77  | 5.13  | 0.43 | 0.14 | 1.01 | 31.60 | 1.11 | 154.10 | 126.30 | 11.51 | 3.52  | 19.23  | 6.99   |
| 351 | 64 | Kalimantan Timur   | 6401 | Paser                  | 4.90  | 3.68  | 6.40  | 1.56 | 0.90 | 2.52 | 15.70 | 1.91 | 79.80  | 101.20 | 25.49 | 10.58 | 61.15  | 51.52  |
| 352 |    |                    | 6402 | Kutai Barat            | 5.64  | 4.32  | 7.23  | 3.75 | 2.68 | 5.10 | 25.10 | 3.61 | 117.70 | 240.50 | 14.59 | 8.16  | 34.81  | 35.64  |
| 353 |    |                    | 6403 | Kutai Kartanegara      | 13.70 | 11.70 | 15.94 | 1.64 | 1.00 | 2.55 | 18.70 | 1.24 | 48.60  | 100.20 | 21.03 | 9.55  | 60.03  | 39.00  |
| 354 |    |                    | 6404 | Kutai Timur            | 10.03 | 8.02  | 12.35 | 0.89 | 0.38 | 1.72 | 24.70 | 1.92 | 179.00 | 127.70 | 29.67 | 13.51 | 97.08  | 202.36 |
| 355 |    |                    | 6405 | Berau                  | 8.89  | 6.94  | 11.19 | 2.54 | 1.62 | 3.78 | 17.80 | 2.46 | 83.90  | 241.00 | 13.08 | 4.01  | 84.69  | 28.52  |
| 356 |    |                    | 6406 | Malinau                | 11.00 | 8.64  | 13.77 | 3.69 | 2.44 | 5.34 | 56.60 | 5.38 | 273.30 | 471.80 | 13.95 | 21.32 | 5.00   | 18.22  |
| 357 |    |                    | 6407 | Bulungan               | 9.49  | 7.41  | 11.96 | 1.93 | 1.14 | 3.05 | 29.90 | 2.76 | 11.50  | 246.00 | 21.91 | 9.58  | 61.31  | 65.73  |
| 358 |    |                    | 6408 | Nunukan                | 9.05  | 7.18  | 11.24 | 0.86 | 0.39 | 1.63 | 38.60 | 2.21 | 115.90 | 179.00 | 16.09 | 5.17  | 99.12  | 2.70   |
| 359 |    |                    | 6409 | Penajam Paser Utara    | 8.12  | 6.29  | 10.29 | 1.21 | 0.60 | 2.18 | 27.80 | 1.99 | 41.70  | 129.90 | 21.18 | 7.15  | 80.78  | 41.46  |
| 360 |    |                    | 6410 | Tana Tidung            | 12.74 | 9.73  | 16.33 | 1.76 | 0.80 | 3.31 | 45.40 | 6.81 | 0.00   | 573.60 | 8.32  | 3.71  | 120.00 | 36.00  |
| 361 |    |                    | 6471 | Balikpapan             | 5.22  | 3.93  | 6.78  | 3.55 | 2.54 | 4.82 | 26.90 | 1.25 | 249.30 | 184.60 | 13.60 | 5.57  | 30.34  | 13.04  |
| 362 |    |                    | 6472 | Samarinda              | 5.85  | 4.55  | 7.40  | 2.87 | 1.96 | 4.05 | 24.10 | 0.85 | 250.20 | 186.30 | 14.98 | 5.73  | 45.00  | 14.14  |
| 363 |    |                    | 6473 | Tarakan                | 16.59 | 13.98 | 19.53 | 3.68 | 2.57 | 5.09 | 33.50 | 0.94 | 173.20 | 197.30 | 12.74 | 3.48  | 21.05  | 5.50   |
| 364 |    |                    | 6474 | Bontang                | 16.02 | 12.90 | 19.56 | 6.86 | 5.03 | 9.06 | 24.00 | 1.08 | 274.00 | 194.10 | 13.81 | 6.33  | 28.64  | 11.21  |
| 365 | 71 | Sulawesi Utara     | 7101 | Bolaang Mongondow      | 4.38  | 3.25  | 5.77  | 1.35 | 0.75 | 2.23 | 20.10 | 2.14 | 100.40 | 287.40 | 16.43 | 3.04  | 53.16  | 7.64   |
| 366 |    |                    | 7102 | Minahasa               | 8.19  | 6.61  | 10.03 | 2.60 | 1.70 | 3.78 | 23.60 | 1.93 | 173.50 | 117.00 | 13.54 | 2.03  | 33.41  | 8.61   |
| 367 |    |                    | 7103 | Kepulauan Sangihe      | 5.58  | 4.27  | 7.16  | 1.94 | 1.19 | 2.97 | 50.60 | 3.63 | 293.90 | 322.70 | 22.36 | 3.59  | 78.79  | 16.39  |
| 368 |    |                    | 7104 | Kepulauan Talaud       | 6.00  | 4.51  | 7.82  | 1.60 | 0.89 | 2.63 | 38.80 | 7.19 | 194.10 | 73.10  | 24.93 | 3.01  | 182.18 | 87.70  |
| 369 |    |                    | 7105 | Minahasa Selatan       | 3.25  | 2.33  | 4.42  | 0.92 | 0.46 | 1.63 | 38.50 | 2.49 | 97.10  | 120.40 | 15.50 | 2.46  | 43.54  | 5.78   |
| 370 |    |                    | 7106 | Minahasa Utara         | 8.04  | 6.40  | 9.96  | 2.69 | 1.84 | 3.79 | 40.90 | 1.66 | 39.30  | 135.70 | 23.15 | 4.44  | 35.75  | 4.69   |
| 371 |    |                    | 7107 | Bolaang Mongondow Utr  | 4.86  | 3.54  | 6.49  | 1.56 | 0.90 | 2.50 | 43.10 | 4.45 | 27.00  | 84.90  | 14.67 | 3.17  | 135.00 | 228.84 |
| 372 |    |                    | 7108 | Siau Tagulandang Biaro | 4.64  | 3.37  | 6.19  | 2.20 | 1.28 | 3.45 | 70.20 | 5.82 | 53.80  | 337.50 | 19.95 | 5.61  | 50.50  | 14.39  |
| 373 |    |                    | 7109 | Minahasa Tenggara      | 6.37  | 4.92  | 8.11  | 2.89 | 1.93 | 4.15 | 37.90 | 3.42 | 62.60  | 241.00 | 13.69 | 5.18  | 66.80  | 17.91  |
| 374 |    |                    | 7110 | Bolaang Mongondow Slt  | 2.82  | 1.79  | 4.21  | 0.48 | 0.13 | 1.24 | 21.70 | 3.51 | 83.60  | 97.00  | 23.82 | 4.62  | 130.96 | 17.23  |
| 375 |    |                    | 7111 | Bolaang Mongondow Tm   | 3.07  | 2.07  | 4.40  | 0.59 | 0.21 | 1.29 | 18.00 | 2.25 | 0.00   | 89.80  | 13.66 | 3.47  | 66.61  | 14.51  |

|     |    |                   |      |                    |       |       |       |      |      |      |       |      |        |        |       |      |        |       |
|-----|----|-------------------|------|--------------------|-------|-------|-------|------|------|------|-------|------|--------|--------|-------|------|--------|-------|
| 376 |    |                   | 7171 | Manado             | 8.79  | 7.31  | 10.49 | 2.72 | 1.90 | 3.76 | 74.50 | 1.11 | 547.60 | 451.00 | 14.04 | 2.03 | 36.39  | 4.46  |
| 377 |    |                   | 7172 | Bitung             | 8.28  | 6.64  | 10.20 | 4.47 | 3.28 | 5.94 | 39.60 | 1.37 | 178.20 | 194.00 | 22.82 | 3.69 | 39.68  | 4.30  |
| 378 |    |                   | 7173 | Tomohon            | 12.69 | 10.53 | 15.15 | 6.03 | 4.59 | 7.77 | 50.00 | 2.19 | 502.70 | 457.90 | 11.79 | 1.39 | 29.01  | 2.52  |
| 379 |    |                   | 7174 | Kotamobagu         | 5.48  | 4.04  | 7.25  | 3.04 | 2.01 | 4.41 | 31.90 | 1.33 | 172.00 | 156.90 | 10.51 | 2.73 | 15.49  | 3.41  |
| 380 | 72 | Sulawesi Tengah   | 7201 | Banggai Kepulauan  | 8.11  | 6.32  | 10.23 | 0.64 | 0.23 | 1.40 | 9.70  | 2.43 | 41.10  | 288.20 | 19.33 | 3.94 | 50.00  | 4.76  |
| 381 |    |                   | 7202 | Banggai            | 4.71  | 3.59  | 6.06  | 2.64 | 1.80 | 3.73 | 20.10 | 2.06 | 76.30  | 246.60 | 15.27 | 3.40 | 26.71  | 4.71  |
| 382 |    |                   | 7203 | Morowali           | 4.75  | 3.46  | 6.35  | 3.82 | 2.67 | 5.29 | 17.10 | 2.56 | 49.90  | 226.30 | 24.44 | 4.83 | 49.16  | 16.68 |
| 383 |    |                   | 7204 | Poso               | 4.50  | 3.32  | 5.96  | 3.20 | 2.24 | 4.43 | 16.90 | 2.79 | 156.60 | 275.50 | 13.26 | 3.41 | 77.25  | 12.66 |
| 384 |    |                   | 7205 | Donggala           | 3.44  | 2.48  | 4.64  | 2.83 | 1.97 | 3.93 | 14.40 | 1.50 | 42.80  | 123.70 | 31.37 | 3.71 | 128.11 | 25.05 |
| 385 |    |                   | 7206 | Toli-Toli          | 3.85  | 2.76  | 5.22  | 2.64 | 1.75 | 3.81 | 12.30 | 1.84 | 43.90  | 194.10 | 31.88 | 4.42 | 41.69  | 10.33 |
| 386 |    |                   | 7207 | Buol               | 9.89  | 8.07  | 12.00 | 1.75 | 1.06 | 2.71 | 11.20 | 2.31 | 61.70  | 364.70 | 25.24 | 5.20 | 78.55  | 20.59 |
| 387 |    |                   | 7208 | Parigi Moutong     | 3.36  | 2.40  | 4.58  | 0.86 | 0.46 | 1.48 | 5.80  | 1.41 | 50.90  | 166.50 | 29.69 | 3.53 | 139.22 | 44.22 |
| 388 |    |                   | 7209 | Tojo Una-Una       | 9.43  | 7.53  | 11.66 | 4.87 | 3.55 | 6.51 | 16.80 | 2.63 | 92.90  | 210.80 | 27.57 | 6.01 | 109.04 | 41.42 |
| 389 |    |                   | 7210 | Sigi               | 3.89  | 2.84  | 5.18  | 4.66 | 3.51 | 6.04 | 9.90  | 2.46 | 0.00   | 176.50 | 21.10 | 2.35 | 59.02  | 12.89 |
| 390 |    |                   | 7271 | Palu               | 9.13  | 7.40  | 11.13 | 5.81 | 4.47 | 7.42 | 56.80 | 0.99 | 485.90 | 411.20 | 11.93 | 3.87 | 20.22  | 5.72  |
| 391 | 73 | Sulawesi Selatan  | 7301 | Kepulauan Selayar  | 6.08  | 4.46  | 8.08  | 1.70 | 0.98 | 2.74 | 18.80 | 3.29 | 68.20  | 175.60 | 27.27 | 5.65 | 95.15  | 15.95 |
| 392 |    |                   | 7302 | Bulukumba          | 13.30 | 11.38 | 15.45 | 1.37 | 0.81 | 2.16 | 12.60 | 1.38 | 63.10  | 94.60  | 23.82 | 3.50 | 61.44  | 8.58  |
| 393 |    |                   | 7303 | Bantaeng           | 9.64  | 7.83  | 11.72 | 3.11 | 2.14 | 4.36 | 16.20 | 2.11 | 59.60  | 193.90 | 13.93 | 2.09 | 24.01  | 3.88  |
| 394 |    |                   | 7304 | Jeneponto          | 18.58 | 16.22 | 21.18 | 5.12 | 3.90 | 6.59 | 8.90  | 1.51 | 26.20  | 99.40  | 17.51 | 2.82 | 44.35  | 6.39  |
| 395 |    |                   | 7305 | Takalar            | 11.05 | 9.26  | 13.08 | 3.94 | 2.90 | 5.22 | 12.10 | 1.60 | 94.40  | 170.90 | 16.26 | 2.66 | 36.03  | 7.03  |
| 396 |    |                   | 7306 | Gowa               | 11.72 | 10.11 | 13.51 | 4.19 | 3.25 | 5.31 | 10.40 | 1.10 | 42.50  | 50.90  | 24.93 | 2.76 | 60.88  | 8.93  |
| 397 |    |                   | 7307 | Sinjai             | 6.99  | 5.56  | 8.67  | 1.43 | 0.82 | 2.31 | 20.10 | 2.01 | 63.10  | 164.30 | 17.50 | 2.05 | 30.00  | 1.62  |
| 398 |    |                   | 7308 | Maros              | 6.14  | 4.61  | 7.99  | 0.57 | 0.17 | 1.37 | 16.80 | 1.26 | 83.40  | 162.30 | 24.29 | 3.06 | 49.26  | 7.14  |
| 399 |    |                   | 7309 | Pangkajene dan Kep | 7.86  | 6.39  | 9.56  | 2.07 | 1.35 | 3.02 | 19.70 | 2.16 | 74.50  | 129.90 | 22.36 | 4.10 | 91.25  | 30.29 |
| 400 |    |                   | 7310 | Barru              | 11.57 | 9.74  | 13.65 | 2.56 | 1.72 | 3.65 | 19.00 | 2.68 | 85.90  | 173.50 | 15.55 | 2.31 | 37.64  | 5.69  |
| 401 |    |                   | 7311 | Bone               | 2.92  | 2.16  | 3.86  | 0.90 | 0.52 | 1.46 | 9.10  | 1.52 | 53.30  | 94.10  | 23.49 | 2.48 | 32.49  | 4.34  |
| 402 |    |                   | 7312 | Soppeng            | 6.15  | 4.85  | 7.67  | 2.08 | 1.31 | 3.13 | 4.70  | 2.18 | 64.10  | 139.40 | 14.51 | 2.31 | 47.71  | 9.77  |
| 403 |    |                   | 7313 | Wajo               | 7.97  | 6.63  | 9.51  | 2.17 | 1.49 | 3.06 | 11.70 | 1.71 | 68.30  | 130.70 | 13.00 | 1.73 | 55.00  | 6.96  |
| 404 |    |                   | 7314 | Sidenreng Rappang  | 10.15 | 8.53  | 11.99 | 2.23 | 1.50 | 3.18 | 15.50 | 1.48 | 94.30  | 144.30 | 13.30 | 2.15 | 25.88  | 3.90  |
| 405 |    |                   | 7315 | Pinrang            | 8.32  | 6.81  | 10.07 | 4.08 | 3.03 | 5.38 | 14.40 | 1.23 | 74.10  | 114.20 | 29.85 | 8.70 | 32.02  | 9.10  |
| 406 |    |                   | 7316 | Enrekang           | 9.63  | 8.01  | 11.46 | 3.03 | 2.14 | 4.16 | 12.60 | 1.96 | 96.60  | 140.80 | 15.26 | 1.91 | 70.86  | 13.86 |
| 407 |    |                   | 7317 | Luwu               | 5.62  | 4.40  | 7.07  | 3.98 | 2.97 | 5.23 | 13.50 | 1.81 | 140.50 | 107.90 | 23.50 | 3.14 | 44.03  | 7.01  |
| 408 |    |                   | 7318 | Tana Toraja        | 9.17  | 7.31  | 11.36 | 2.26 | 1.37 | 3.49 | 19.50 | 2.73 | 262.80 | 132.00 | 53.19 | 3.36 | 96.36  | 24.56 |
| 409 |    |                   | 7322 | Luwu Utara         | 11.81 | 9.85  | 14.04 | 2.19 | 1.41 | 3.26 | 12.00 | 1.30 | 0.00   | 108.50 | 21.57 | 3.69 | 22.50  | 9.18  |
| 410 |    |                   | 7325 | Luwu Timur         | 8.15  | 6.48  | 10.12 | 1.28 | 0.68 | 2.17 | 14.20 | 1.77 | 65.80  | 126.40 | 16.39 | 3.65 | 12.59  | 7.88  |
| 411 |    |                   | 7326 | Toraja Utara       | 10.67 | 8.81  | 12.81 | 6.83 | 5.37 | 8.55 | 15.50 | 3.31 | 0.00   | 126.30 | 30.85 | 4.54 | 41.76  | 20.23 |
| 412 |    |                   | 7371 | Makassar           | 6.35  | 5.19  | 7.70  | 4.97 | 3.95 | 6.16 | 32.50 | 0.92 | 431.90 | 223.60 | 16.35 | 3.66 | 26.87  | 6.34  |
| 413 |    |                   | 7372 | Parepare           | 11.58 | 9.68  | 13.75 | 3.00 | 2.07 | 4.21 | 30.40 | 1.33 | 393.90 | 454.60 | 21.23 | 2.06 | 26.96  | 2.80  |
| 414 |    |                   | 7373 | Palopo             | 9.60  | 7.77  | 11.73 | 4.98 | 3.65 | 6.63 | 27.80 | 2.13 | 330.60 | 351.90 | 18.98 | 3.20 | 23.36  | 4.92  |
| 415 | 74 | Sulawesi Tenggara | 7401 | Buton              | 2.37  | 1.47  | 3.61  | 0.44 | 0.12 | 1.15 | 5.80  | 3.57 | 21.30  | 188.50 | 19.93 | 3.85 | 89.74  | 19.57 |
| 416 |    |                   | 7402 | Muna               | 2.44  | 1.60  | 3.55  | 0.56 | 0.20 | 1.23 | 23.10 | 4.34 | 31.70  | 73.30  | 12.98 | 3.04 | 39.59  | 9.96  |
| 417 |    |                   | 7403 | Konawe             | 8.82  | 7.22  | 10.66 | 4.35 | 3.24 | 5.72 | 17.60 | 3.55 | 0.00   | 122.90 | 17.27 | 3.27 | 18.63  | 9.87  |
| 418 |    |                   | 7404 | Kolaka             | 19.06 | 16.59 | 21.77 | 2.73 | 1.85 | 3.87 | 13.20 | 2.20 | 90.30  | 160.80 | 15.95 | 3.83 | 56.50  | 14.41 |
| 419 |    |                   | 7405 | Konawe Selatan     | 6.37  | 5.03  | 7.94  | 1.92 | 1.22 | 2.86 | 12.20 | 2.41 | 17.50  | 78.20  | 27.84 | 7.81 | 85.86  | 55.37 |
| 420 |    |                   | 7406 | Bombana            | 5.60  | 4.15  | 7.37  | 0.63 | 0.25 | 1.30 | 24.50 | 4.38 | 23.20  | 112.70 | 17.97 | 3.62 | 49.51  | 12.23 |
| 421 |    |                   | 7407 | Wakatobi           | 9.15  | 7.19  | 11.47 | 0.46 | 0.08 | 1.37 | 14.90 | 5.96 | 76.50  | 255.20 | 13.57 | 2.38 | 119.45 | 47.61 |
| 422 |    |                   | 7408 | Kolaka Utara       | 13.48 | 11.35 | 15.88 | 0.75 | 0.34 | 1.43 | 13.70 | 3.65 | 76.10  | 126.30 | 16.88 | 4.10 | 152.02 | 23.65 |
| 423 |    |                   | 7409 | Buton Utara        | 5.21  | 3.82  | 6.93  | 0.21 | 0.02 | 0.77 | 32.10 | 5.06 | 32.10  | 325.60 | 9.11  | 2.11 | 60.25  | 9.53  |

|     |    |                |      |                       |       |       |       |      |      |      |        |       |        |        |        |       |        |         |
|-----|----|----------------|------|-----------------------|-------|-------|-------|------|------|------|--------|-------|--------|--------|--------|-------|--------|---------|
| 424 |    |                | 7410 | Konawe Utara          | 4.10  | 2.83  | 5.74  | 1.20 | 0.57 | 2.20 | 12.50  | 7.63  | 86.00  | 96.80  | 32.43  | 5.82  | 89.61  | 31.93   |
| 425 |    |                | 7411 | Kendari               | 6.64  | 5.24  | 8.29  | 1.77 | 1.07 | 2.72 | 32.50  | 1.43  | 278.30 | 259.80 | 22.62  | 2.90  | 38.08  | 5.52    |
| 426 |    |                | 7412 | Baubau                | 8.37  | 6.64  | 10.42 | 0.71 | 0.25 | 1.55 | 25.60  | 3.44  | 89.60  | 212.30 | 10.09  | 2.03  | 19.42  | 3.96    |
| 427 | 75 | Gorontalo      | 7501 | Boalemo               | 9.14  | 7.34  | 11.24 | 2.84 | 1.90 | 4.09 | 22.70  | 2.34  | 61.70  | 120.60 | 18.56  | 2.87  | 38.12  | 11.11   |
| 428 |    |                | 7502 | Gorontalo             | 8.82  | 7.30  | 10.57 | 2.08 | 1.37 | 3.01 | 33.70  | 1.62  | 99.20  | 192.40 | 17.09  | 1.95  | 44.21  | 5.75    |
| 429 |    |                | 7503 | Pohuwato              | 5.45  | 4.14  | 7.03  | 3.53 | 2.51 | 4.83 | 20.70  | 3.42  | 84.00  | 151.00 | 13.77  | 2.08  | 73.75  | 5.60    |
| 430 |    |                | 7504 | Bone Bolango          | 8.52  | 6.80  | 10.53 | 2.36 | 1.55 | 3.44 | 22.00  | 3.88  | 129.90 | 111.10 | 10.72  | 2.39  | 38.23  | 6.15    |
| 431 |    |                | 7505 | Gorontalo Utara       | 13.08 | 10.78 | 15.71 | 1.62 | 0.90 | 2.68 | 26.40  | 3.96  | 10.60  | 154.10 | 19.42  | 2.14  | 155.75 | 20.81   |
| 432 |    |                | 7571 | Kota Gorontalo        | 18.55 | 16.32 | 20.99 | 6.11 | 4.86 | 7.58 | 9.20   | 1.53  | 277.90 | 62.10  | 17.66  | 1.75  | 18.13  | 3.49    |
| 433 | 76 | Sulawesi Barat | 7601 | Majene                | 10.87 | 8.90  | 13.16 | 2.59 | 1.67 | 3.82 | 12.50  | 1.97  | 77.60  | 214.90 | 16.09  | 2.51  | 48.23  | 6.00    |
| 434 |    |                | 7602 | Polewali Mandar       | 3.28  | 2.39  | 4.41  | 1.45 | 0.88 | 2.25 | 9.80   | 1.37  | 55.10  | 81.50  | 21.49  | 3.33  | 24.89  | 4.01    |
| 435 |    |                | 7603 | Mamasa                | 8.71  | 6.97  | 10.75 | 0.58 | 0.18 | 1.36 | 18.70  | 3.28  | 105.60 | 139.10 | 34.91  | 13.32 | 43.91  | 9.17    |
| 436 |    |                | 7604 | Mamuju                | 1.75  | 1.07  | 2.69  | 1.23 | 0.68 | 2.05 | 27.00  | 2.57  | 34.80  | 132.20 | 16.82  | 4.66  | 68.09  | 14.24   |
| 437 |    |                | 7605 | Mamuju Utara          | 4.44  | 3.04  | 6.22  | 1.66 | 0.95 | 2.67 | 20.10  | 2.82  | 43.00  | 126.20 | 21.21  | 3.09  | 17.96  | 3.60    |
| 438 | 81 | Maluku         | 8101 | Maluku Tenggara       | 9.43  | 7.57  | 11.60 | 1.32 | 0.71 | 2.23 | 26.10  | 4.19  | 265.80 | 576.20 | 12.99  | 2.34  | 50.30  | 12.44   |
| 439 |    |                | 8102 | Maluku Tenggara Barat | 14.30 | 12.00 | 16.91 | 4.13 | 2.93 | 5.63 | 15.30  | 3.32  | 55.40  | 260.80 | 17.16  | 6.28  | 87.07  | 58.58   |
| 440 |    |                | 8103 | Maluku Tengah         | 7.11  | 5.76  | 8.68  | 1.26 | 0.73 | 2.02 | 28.30  | 2.46  | 69.90  | 200.80 | 70.78  | 7.27  | 149.06 | 44.45   |
| 441 |    |                | 8104 | Buru                  | 3.31  | 2.20  | 4.77  | 1.24 | 0.60 | 2.25 | 16.60  | 2.24  | 45.20  | 337.80 | 38.90  | 13.90 | 76.80  | 319.64  |
| 442 |    |                | 8105 | Kepulauan Aru         | 5.99  | 4.48  | 7.83  | 0.87 | 0.37 | 1.74 | 27.70  | 7.68  | 131.80 | 465.20 | 43.71  | 14.13 | 177.61 | 56.28   |
| 443 |    |                | 8106 | Seram Bagian Barat    | 1.91  | 1.14  | 2.99  | 0.18 | 0.02 | 0.65 | 12.00  | 2.78  | 26.30  | 278.60 | 25.45  | 7.74  | 113.20 | 26.00   |
| 444 |    |                | 8107 | Seram Bagian Timur    | 3.20  | 2.08  | 4.69  | 0.10 | 0.00 | 0.54 | 19.90  | 5.17  | 70.40  | 346.20 | 36.79  | 32.90 | 381.83 | 1329.05 |
| 445 |    |                | 8108 | Maluku Barat Daya     | 9.72  | 7.81  | 11.95 | 0.29 | 0.06 | 0.83 | 24.10  | 7.62  | 0.00   | 243.80 | 33.83  | 17.63 | 490.91 | 1560.00 |
| 446 |    |                | 8109 | Buru Selatan          | 2.16  | 1.04  | 3.85  | 0.56 | 0.01 | 2.21 | 18.40  | 6.02  | 14.30  | 162.20 | 28.07  | 7.39  | 54.30  | 51.88   |
| 447 |    |                | 8171 | Ambon                 | 7.83  | 6.38  | 9.51  | 2.42 | 1.65 | 3.43 | 28.20  | 6.03  | 166.10 | 299.20 | 21.01  | 4.26  | 47.32  | 8.83    |
| 448 |    |                | 8172 | Tual                  | 11.01 | 8.88  | 13.48 | 3.79 | 2.55 | 5.40 | 13.90  | 1.79  | 0.00   | 326.10 | 16.12  | 3.86  | 41.12  | 38.82   |
| 449 | 82 | Maluku Utara   | 8201 | Halmahera Barat       | 4.72  | 3.42  | 6.35  | 2.21 | 1.36 | 3.39 | 26.30  | 2.99  | 272.60 | 247.20 | 23.14  | 8.19  | 64.84  | 49.51   |
| 450 |    |                | 8202 | Halmahera Tengah      | 13.88 | 10.93 | 17.36 | 0.55 | 0.06 | 2.01 | 42.50  | 7.01  | 288.90 | 533.10 | 10.26  | 5.55  | 50.00  | 172.41  |
| 451 |    |                | 8203 | Kepulauan Sula        | 3.52  | 2.33  | 5.07  | 0.52 | 0.17 | 1.21 | 19.90  | 3.50  | 58.30  | 245.70 | 13.32  | 6.17  | 79.38  | 8.24    |
| 452 |    |                | 8204 | Halmahera Selatan     | 6.31  | 4.85  | 8.06  | 2.42 | 1.57 | 3.56 | 18.30  | 4.11  | 52.10  | 264.70 | 9.23   | 5.08  | 30.00  | 32.50   |
| 453 |    |                | 8205 | Halmahera Utara       | 7.01  | 5.47  | 8.84  | 1.44 | 0.82 | 2.34 | 19.10  | 2.87  | 88.80  | 225.30 | 21.70  | 3.87  | 63.69  | 13.54   |
| 454 |    |                | 8206 | Halmahera Timur       | 8.11  | 6.35  | 10.19 | 0.72 | 0.28 | 1.49 | 28.60  | 5.22  | 128.10 | 439.10 | 28.94  | 6.54  | 138.85 | 81.17   |
| 455 |    |                | 8207 | Pulau Morotai         | 9.20  | 7.15  | 11.65 | 1.93 | 1.03 | 3.27 | 22.40  | 3.11  | 27.60  | 253.70 | 17.75  | 12.46 | 59.05  | 65.49   |
| 456 |    |                | 8271 | Ternate               | 11.27 | 9.25  | 13.56 | 4.79 | 3.61 | 6.22 | 29.40  | 1.47  | 256.10 | 257.60 | 24.27  | 5.96  | 32.93  | 11.62   |
| 457 |    |                | 8272 | Tidore Kepulauan      | 7.79  | 6.14  | 9.76  | 2.83 | 1.89 | 4.07 | 23.20  | 3.03  | 0.00   | 237.30 | 10.43  | 3.21  | 41.22  | 18.97   |
| 458 | 91 | Papua Barat    | 9101 | Fakfak                | 17.45 | 14.57 | 20.70 | 4.54 | 3.05 | 6.45 | 33.70  | 3.89  | 265.80 | 378.70 | 16.13  | 8.02  | 35.25  | 13.93   |
| 459 |    |                | 9102 | Kaimana               | 22.16 | 18.16 | 26.72 | 2.87 | 1.54 | 4.78 | 30.00  | 4.50  | 674.60 | 481.60 | 11.71  | 9.20  | 24.68  | 305.81  |
| 460 |    |                | 9103 | Teluk Wondama         | 7.87  | 5.58  | 10.74 | 0.89 | 0.29 | 2.01 | 59.30  | 5.93  | 493.90 | 500.50 | 19.32  | 12.08 | 89.23  | 936.20  |
| 461 |    |                | 9104 | Teluk Bintuni         | 3.61  | 2.07  | 5.72  | 0.12 | 0.00 | 0.67 | 19.80  | 9.92  | 114.10 | 52.90  | 41.76  | 10.73 | 120.00 | 180.00  |
| 462 |    |                | 9105 | Manokwari             | 6.09  | 4.37  | 8.18  | 3.00 | 1.63 | 4.85 | 14.30  | 3.74  | 0.00   | 227.10 | 13.79  | 7.96  | 14.94  | 9.89    |
| 463 |    |                | 9106 | Sorong Selatan        | 12.34 | 9.01  | 16.46 | 1.04 | 0.26 | 2.69 | 25.10  | 10.25 | 300.70 | 268.80 | 15.00  | 4.50  | 26.82  | 21.68   |
| 464 |    |                | 9107 | Sorong                | 10.91 | 8.58  | 13.63 | 0.61 | 0.22 | 1.33 | 68.70  | 6.26  | 0.00   | 630.80 | 23.79  | 7.97  | 113.18 | 77.10   |
| 465 |    |                | 9108 | Raja Ampat            | 12.30 | 9.52  | 15.61 | 1.06 | 0.42 | 2.20 | 28.50  | 11.62 | 155.00 | 628.00 | 9.33   | 1.90  | 75.84  | 51.75   |
| 466 |    |                | 9109 | Tambrau               | 17.83 | 13.16 | 23.56 | 0.85 | 0.17 | 2.50 | 113.80 | 21.34 | 0.00   | 441.10 | 220.00 | 2.07  | 455.84 | 284.49  |
| 467 |    |                | 9110 | Maybrat               | 15.34 | 12    | 19.3  | 1.39 | 0.55 | 2.88 | 18.40  | 11.03 | 0.00   | 404.50 | 25.82  | 32.34 | 192.50 | 220.50  |
| 468 |    |                | 9171 | Kota Sorong           | 9.77  | 7.6   | 12.3  | 3.60 | 2.38 | 5.18 | 43.20  | 0.82  | 258.20 | 163.70 | 13.30  | 5.14  | 16.26  | 6.71    |
| 469 | 94 | Papua          | 9401 | Merauke               | 9.33  | 7.41  | 11.6  | 1.69 | 0.92 | 2.8  | 20.30  | 2.49  | 169.00 | 170.70 | 25.35  | 15.13 | 42.67  | 60.72   |
| 470 |    |                | 9402 | Jayawijaya            | 8.18  | 6.06  | 10.7  | 0.19 | 0.02 | 0.67 | 9.90   | 1.62  | 301.70 | 146.30 | 71.29  | 14.86 | 21.76  | 30.40   |
| 471 |    |                | 9403 | Jayapura              | 8.76  | 6.84  | 11    | 1.53 | 0.77 | 2.71 | 5.10   | 4.14  | 143.00 | 116.20 | 20.62  | 8.79  | 76.12  | 46.07   |

|     |  |  |      |                    |       |      |      |       |      |      |       |       |        |        |        |       |        |         |
|-----|--|--|------|--------------------|-------|------|------|-------|------|------|-------|-------|--------|--------|--------|-------|--------|---------|
| 472 |  |  | 9404 | Nabire             | 8.15  | 6.35 | 10.3 | 1.78  | 1.02 | 2.86 | 18.80 | 4.88  | 42.50  | 232.70 | 27.48  | 4.30  | 15.67  | 5.27    |
| 473 |  |  | 9408 | Kepulauan Yapen    | 19.81 | 16.9 | 23.1 | 4.47  | 3.15 | 6.15 | 25.50 | 3.82  | 0.00   | 346.80 | 22.02  | 8.83  | 23.33  | 4.75    |
| 474 |  |  | 9409 | Biak Numfor        | 18.39 | 15.9 | 21.2 | 2.50  | 1.63 | 3.68 | 26.30 | 3.46  | 283.90 | 222.40 | 28.84  | 6.28  | 72.63  | 26.94   |
| 475 |  |  | 9410 | Paniai             | 25.36 | 19.7 | 31.7 | 10.15 | 7.54 | 13.3 | 7.40  | 2.86  | 0.00   | 91.10  | 48.45  | 5.45  | 130.91 | 58.40   |
| 476 |  |  | 9411 | Puncak Jaya        | 48.53 | 39.9 | 57.9 | 1.33  | 0.21 | 4.62 | 20.90 | 1.93  | 74.20  | 136.60 | 70.04  | 11.38 | 225.36 | 201.45  |
| 477 |  |  | 9412 | Mimika             | 15.01 | 12.1 | 18.3 | 2.77  | 1.14 | 5.06 | 25.90 | 1.74  | 83.90  | 230.00 | 16.46  | 5.21  | 68.46  | 1202.58 |
| 478 |  |  | 9413 | Boeven Digoel      | 19.93 | 15.5 | 25   | 3.06  | 1.73 | 4.94 | 23.30 | 8.74  | 97.60  | 278.30 | 19.69  | 14.69 | 35.29  | 126.98  |
| 479 |  |  | 9414 | Mappi              | 7.20  | 4.42 | 10.6 | 0.44  | 0.11 | 1.16 | 23.90 | 3.28  | 43.80  | 163.20 | 24.94  | 14.31 | 142.04 | 703.70  |
| 480 |  |  | 9415 | Asmat              | 5.19  | 2.53 | 8.72 | 0.39  | 0.03 | 1.45 | 30.80 | 4.14  | 81.70  | 200.60 | 57.07  | 33.78 | 111.50 | 1434.79 |
| 481 |  |  | 9416 | Yahukimo           | 12.01 | 9.61 | 14.8 | 0.57  | 0.22 | 1.19 | 21.70 | 4.59  | 0.00   | 72.60  | 37.00  | 12.22 | 97.91  | 148.00  |
| 482 |  |  | 9417 | Pegunungan Bintang | 22.02 | 17.6 | 27   | 1.01  | 0.48 | 1.88 | 29.80 | 10.81 | 119.20 | 73.30  | 5.00   | 20.53 | 48.15  | 399.85  |
| 483 |  |  | 9418 | Tolikara           | 9.13  | 6.54 | 12.3 | 0.00  | -    | -    | 12.80 | 5.33  | 0.00   | 94.50  | 2.00   | 1.00  | 60.00  | 203.68  |
| 484 |  |  | 9419 | Sarmi              | 5.65  | 3.97 | 7.79 | 0.00  | -    | -    | 61.60 | 6.66  | 0.00   | 170.10 | 30.96  | 35.23 | 358.72 | 532.92  |
| 485 |  |  | 9420 | Keerom             | 18.32 | 15.3 | 21.8 | 5.06  | 3.47 | 7.12 | 43.50 | 5.02  | 182.50 | 98.80  | 15.74  | 4.70  | 121.14 | 74.37   |
| 486 |  |  | 9426 | Waropen            | 5.10  | 3.18 | 7.76 | 0.00  | -    | -    | 6.60  | 9.90  | 0.00   | 455.20 | 42.82  | 10.83 | 255.00 | 629.00  |
| 487 |  |  | 9427 | Supiori            | 4.36  | 2.77 | 6.48 | 0.74  | 0.24 | 1.74 | 71.70 | 7.68  | 256.00 | 481.20 | 5.00   | 3.87  | 45.00  | 190.25  |
| 488 |  |  | 9428 | Mamberamo Raya     | 8.81  | 5.92 | 12.5 | 1.09  | 0.21 | 3.24 | 84.10 | 9.29  | 79.70  | 446.90 | 153.79 | 50.81 | 369.66 | 3277.37 |
| 489 |  |  | 9429 | Nduga              | 4.09  | 2.27 | 6.56 | 0.99  | 0.09 | 3.15 | 17.50 | 2.47  | 0.00   | 39.10  | 97.50  | 0.00  | 35.00  | 370.00  |
| 490 |  |  | 9430 | Lanny Jaya         | 13.91 | 10.3 | 18.1 | 0.70  | 0.04 | 2.48 | 4.40  | 1.64  | 13.10  | 62.90  | 111.74 | 32.37 | 154.00 | 127.08  |
| 491 |  |  | 9431 | Mamberamo Tengah   | 8.96  | 4    | 15.2 | 0.00  | -    | -    | 22.60 | 3.08  | 0.00   | 94.60  | 86.99  | 3.52  | 150.00 | 51.80   |
| 492 |  |  | 9432 | Yalimo             | 6.44  | 4.59 | 8.71 | 0.37  | 0.03 | 1.36 | 16.00 | 3.36  | 0.00   | 17.60  | 68.80  | 11.79 | 178.90 | 568.07  |
| 493 |  |  | 9433 | Puncak             | 26.16 | 22   | 30.8 | 0.21  | 0.02 | 0.77 | 10.50 | 2.09  | 0.00   | 21.80  | 40.00  | 0.00  | 142.73 | 444.00  |
| 494 |  |  | 9434 | Dogiyai            | 9.47  | 6.87 | 12.6 | 0.00  | -    | -    | 6.80  | 2.89  | 0.00   | 68.50  | 58.29  | 20.41 | 453.28 | 169.04  |
| 495 |  |  | 9435 | Intan Jaya         | 59.37 | 47.8 | 72.2 | 0.00  | -    | -    | 8.00  | 3.61  | 0.00   | 166.60 | 302.30 | 0.00  | 331.30 | 908.91  |
| 496 |  |  | 9436 | Deiyai             | 9.63  | 6.91 | 13   | 0.65  | 0.18 | 1.68 | 3.90  | 3.92  | 0.00   | 81.10  | 58.69  | 0.00  | 51.88  | 50.88   |
| 497 |  |  | 9471 | Kota Jayapura      | 4.64  | 3.32 | 6.29 | 0.76  | 0.3  | 1.57 | 47.50 | 1.14  | 370.70 | 271.60 | 32.87  | 5.24  | 56.14  | 91.34   |
|     |  |  |      |                    |       |      |      |       |      |      |       |       |        |        |        |       |        |         |
